# Supplementary material for: Design of oxygen sensing nanomaterial: synthesis, encapsulation of phenylacetylide substituted Pd(ii) and Pt(ii) meso-tetraphenylporphyrins into poly(1-trimethylsilyl-1-propyne) nanofibers and influence of silver nanoparticles
Source: Royal Society of Chemistry journal article supplement (doi:10.1039/c5ra24817e), 2016-01-01
Supplement: c5ra24817e1.pdf [file c5ra24817e1.pdf]

# Design of Oxygen Sensing Nanomaterial: Synthesis, Encapsulation of Phenylacetylde Substituted Pd(II) and Pt(II) *meso*-tetraphenylporphyrins into Poly(1-trimethylsilyl-1-propyne) Nanofibers and Influence of Silver Nanoparticles

Emel Önal<sup>a</sup>, Zeynep Ay<sup>b</sup>, Zübeyde Yel<sup>a</sup>, Kadriye Ertekin<sup>b</sup>, Ayşe Gül Gürek<sup>a</sup>, Sevinc Zehra Topal<sup>a,\*</sup> and Catherine Hirel<sup>a,\*</sup>

<sup>a</sup> *Gebze Technical University, Faculty of Science, Department of Chemistry, P. O. Box 141, Gebze, 41400 Kocaeli, Turkey*

<sup>b</sup> *Dokuz Eylül University, Faculty of Science, Department of Chemistry, 35160, Buca, İzmir, Turkey*

## Electronic Supplementary Information

**Table S1:** Microwave promoted Pd(II) metal insertion to **H<sub>2</sub>-TPPBr**.

| Entry | Metal salt                     | Organic solvent     | Conditions            | % yield | Procedure according to Ref |
|-------|--------------------------------|---------------------|-----------------------|---------|----------------------------|
| 1     | 2 equiv.PdCl <sub>2</sub>      | PhCN                | 191 °C, Reflux, 1 day | 68      | 26                         |
| 2     | 2.5 equiv.PdCl <sub>2</sub>    | Acetic acid         | Rt. 30 min.           | 10      | 34                         |
| 3     | 2.5 equiv. Pd(II)acetate       | Acetic acid         | Rt. 30 min.           | 5       | 34                         |
| 4     | 3 equiv. Pd(II)acetate         | Chloroform-Methanol | Reflux, 45 min.       | 24      | 35                         |
| 5     | 3 equiv. Pd(acac) <sub>2</sub> | Pyridine            | 180°C, Reflux, 1 day  | 49      | 29                         |
| 6     | 3 equiv. Pd(acac) <sub>2</sub> | Pyridine            | 180°C, MW, 15 min.    | -       | 29                         |
| 7     | 3 equiv. Pd(acac) <sub>2</sub> | NMP                 | 180 °C, MW, 15 min.   | 81      |                            |

**Table S2:** Microwave promoted Pt(II) metal insertion to **H<sub>2</sub>-TPPBr**.

| Entry | Metal salt                               | Organic solvent     | Conditions            | % yield | Procedure according to Ref |
|-------|------------------------------------------|---------------------|-----------------------|---------|----------------------------|
| 1     | 3 equiv.PtCl <sub>2</sub>                | PhCN                | 191 °C, Reflux, 1 day | -       | 26                         |
| 2     | 3 equiv.Pt(acac) <sub>2</sub>            | PhCN                | 191 °C, Reflux, 1 day | 23      | 36                         |
| 3     | 3 equiv.Pt(acac) <sub>2</sub>            | PhCN                | 191 °C, MW, 45 min.   | -       | 29                         |
| 4     | 3 equiv.Pt(acac) <sub>2</sub>            | Chloroform-Methanol | 70 °C, Reflux, 1 day  | -       | 35                         |
| 5     | 3 equiv.K <sub>2</sub> PtCl <sub>4</sub> | NMP                 | 100 °C, MW, 50 min.   | -       |                            |
| 6     | 3 equiv.Pt(acac) <sub>2</sub>            | NMP                 | 110°C, MW, 45 min.    | 25      |                            |

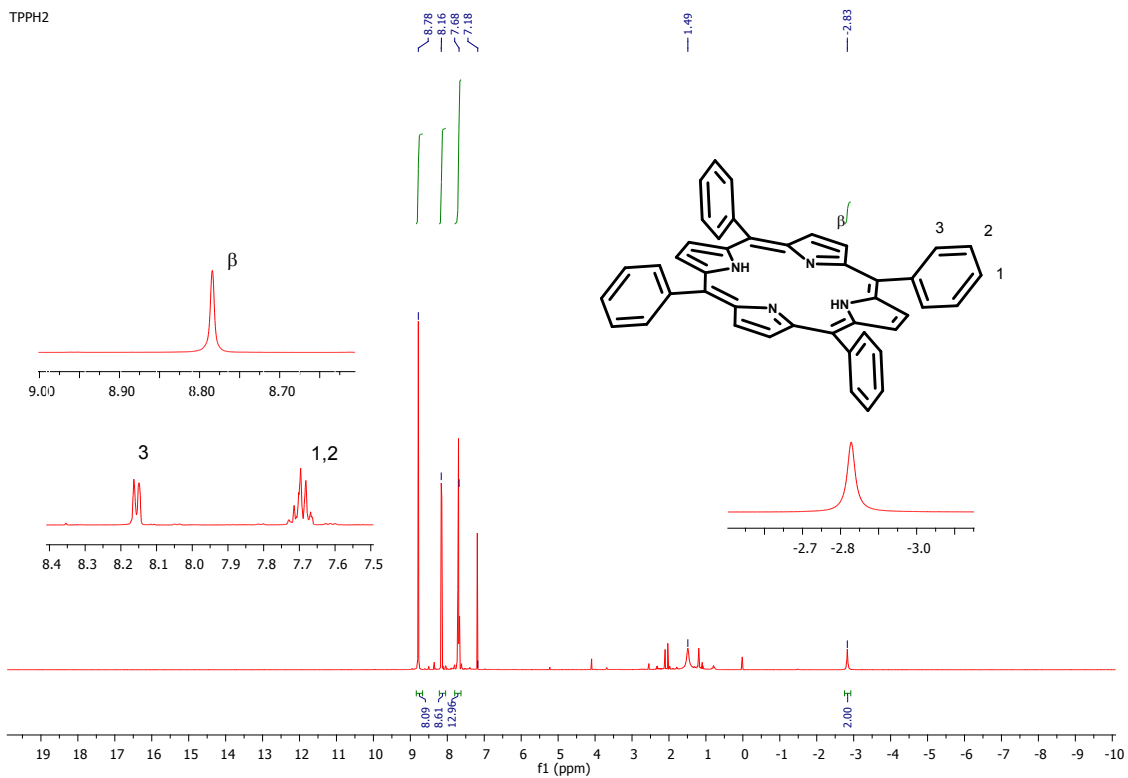

**Figure S1.**  $^1H$  NMR spectrum of *meso*-tetraphenylporphyrin ( $H_2$ -TPP)

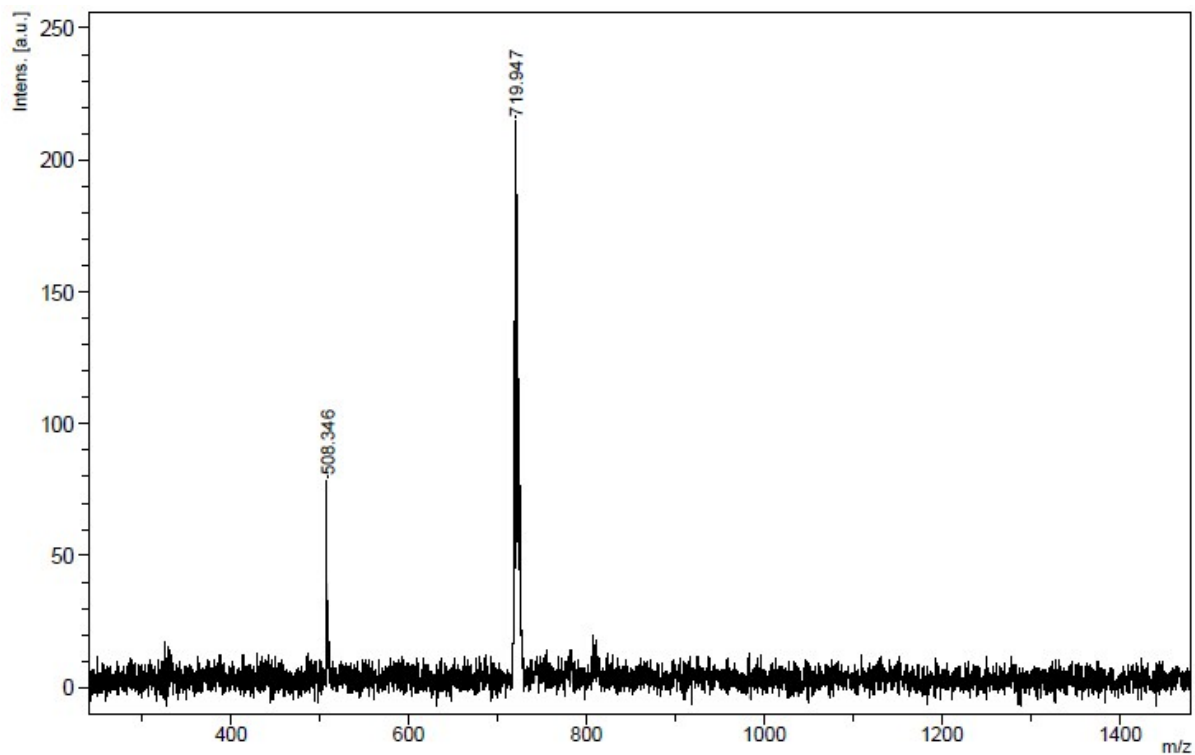

**Figure S2.** MALDI-MS spectrum of *meso*-tetraphenylporphyrinato palladium (Pd-TPP)

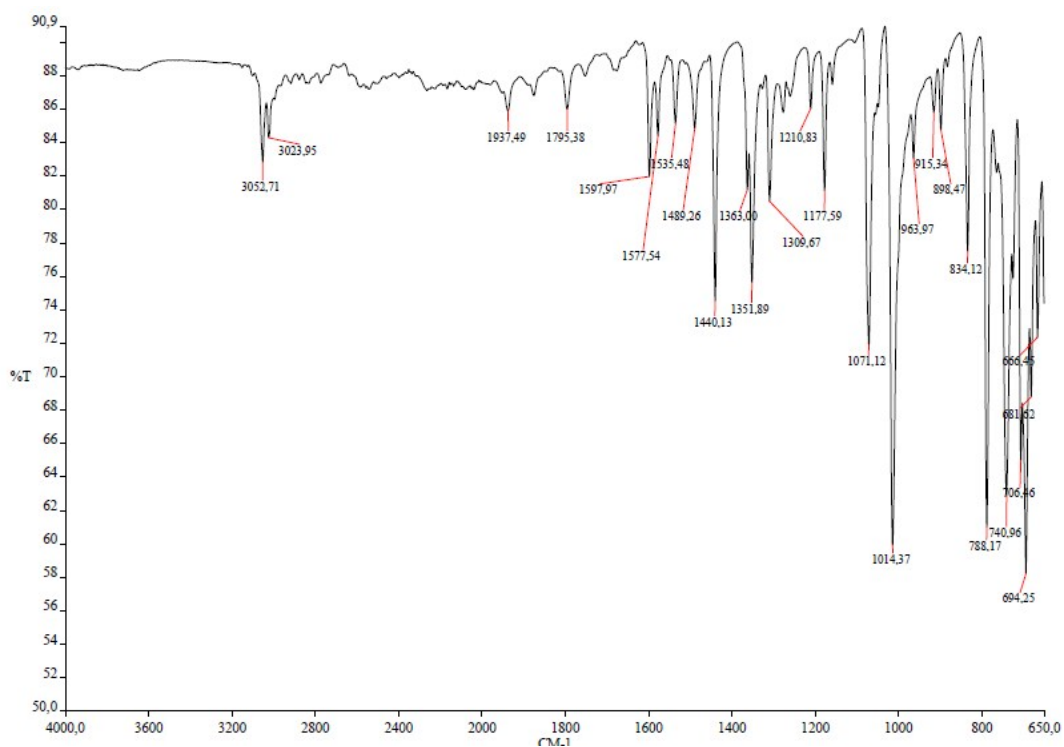

**Figure S3.** FT-IR spectrum of *meso*-tetraphenylporphyrinato palladium (Pd-TPP)

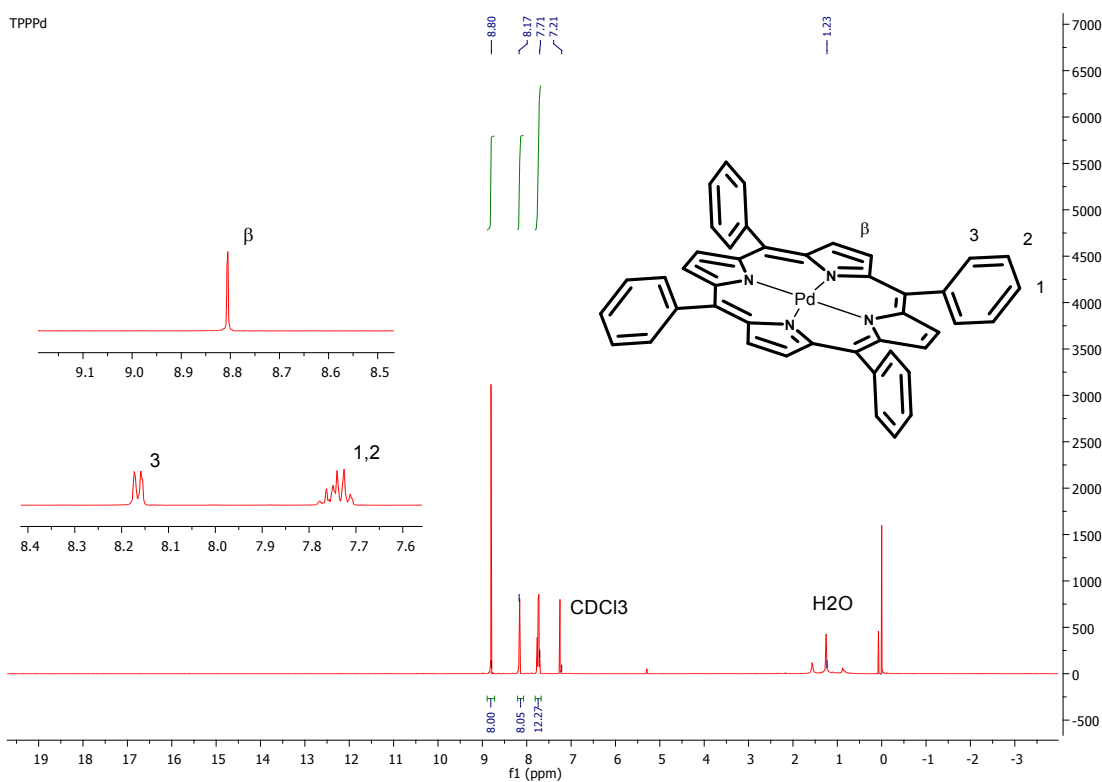

**Figure S4.** <sup>1</sup>H NMR spectrum of *meso*-tetraphenylporphyrinato palladium (Pd-TPP)

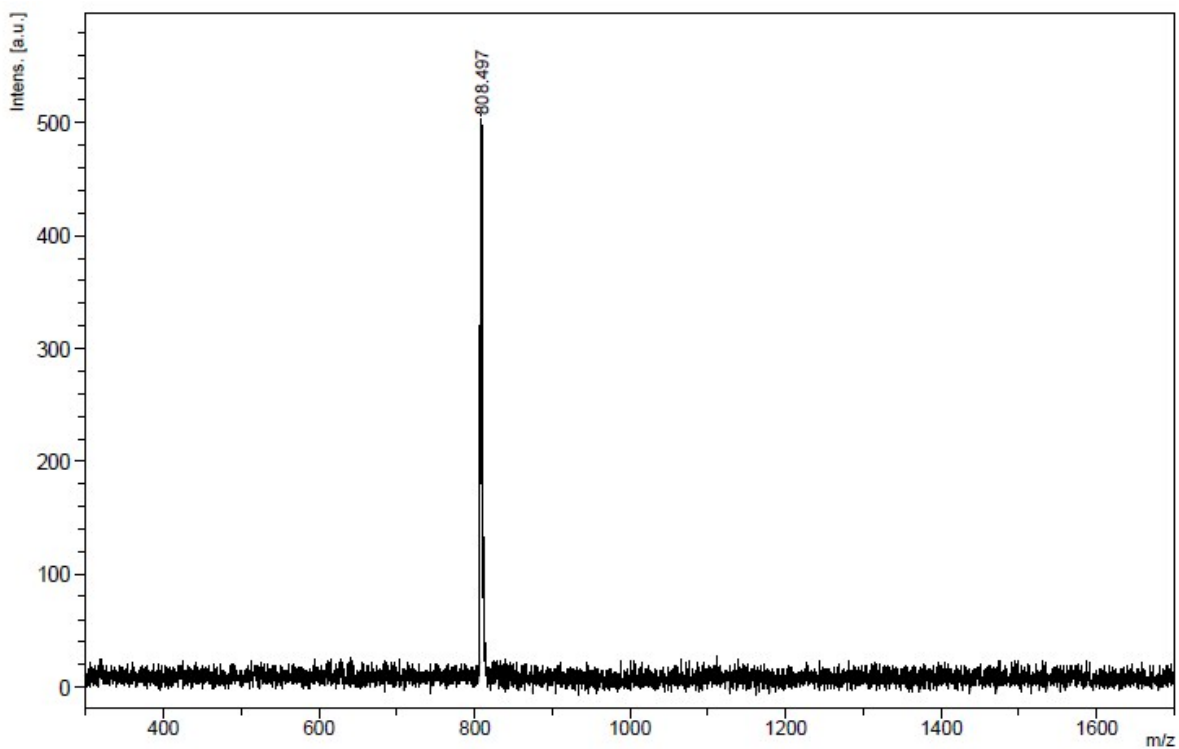

**Figure S5.** MALDI-MS spectrum of *meso*-tetraphenylporphyrinato platinum (**Pt-TPP**)

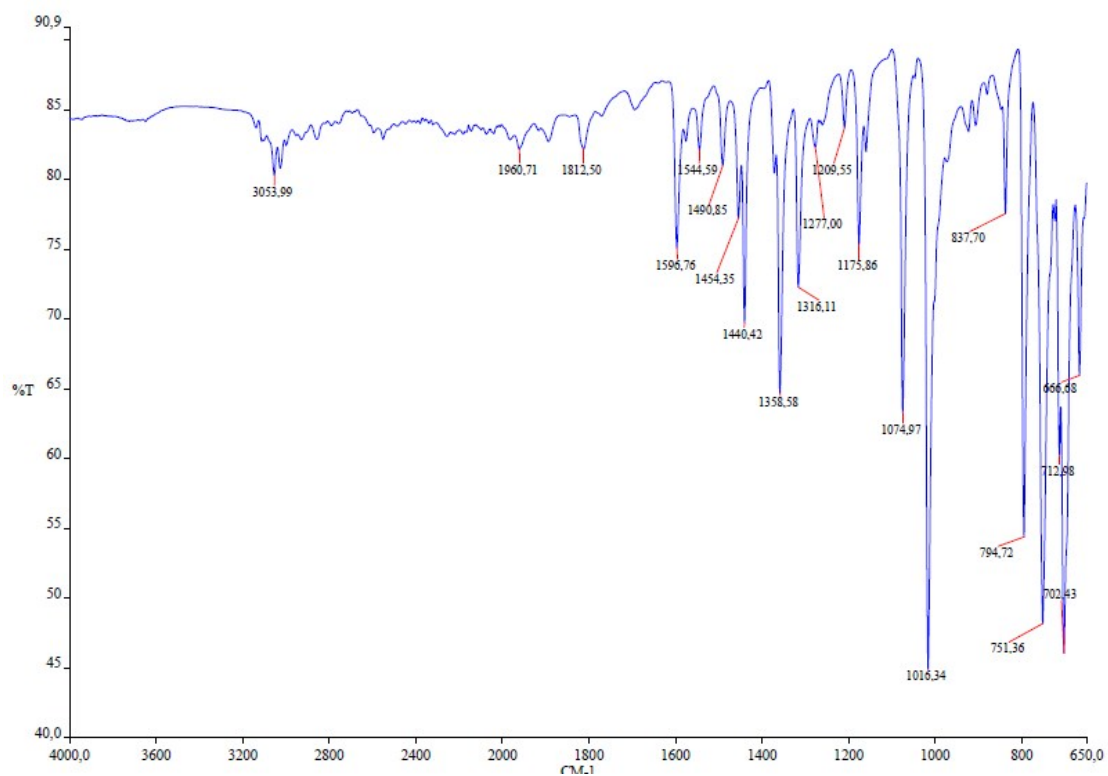

**Figure S6.** FT-IR spectrum of *meso*-tetraphenylporphyrinato platinum (**Pt-TPP**)

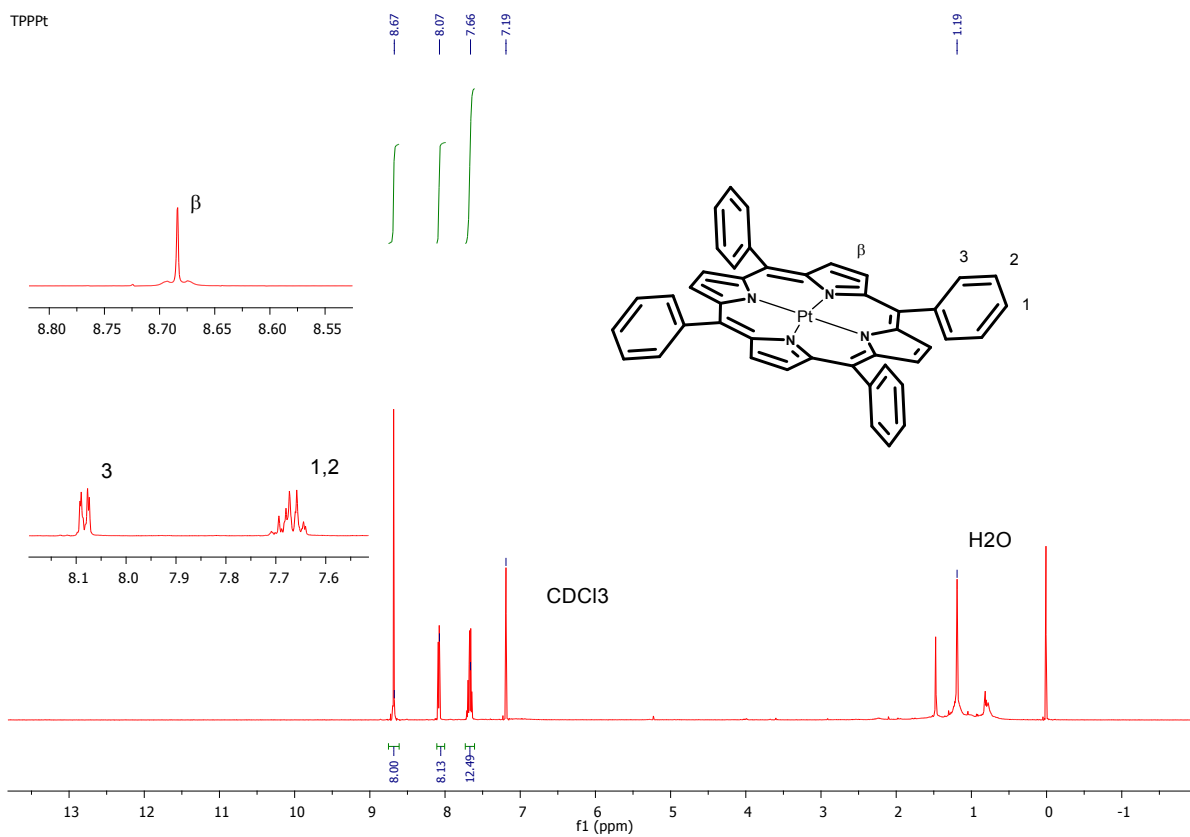

**Figure S7.**  $^1\text{H}$  NMR spectrum of *meso*-tetraphenylporphyrinato platinum (Pt-TPP)

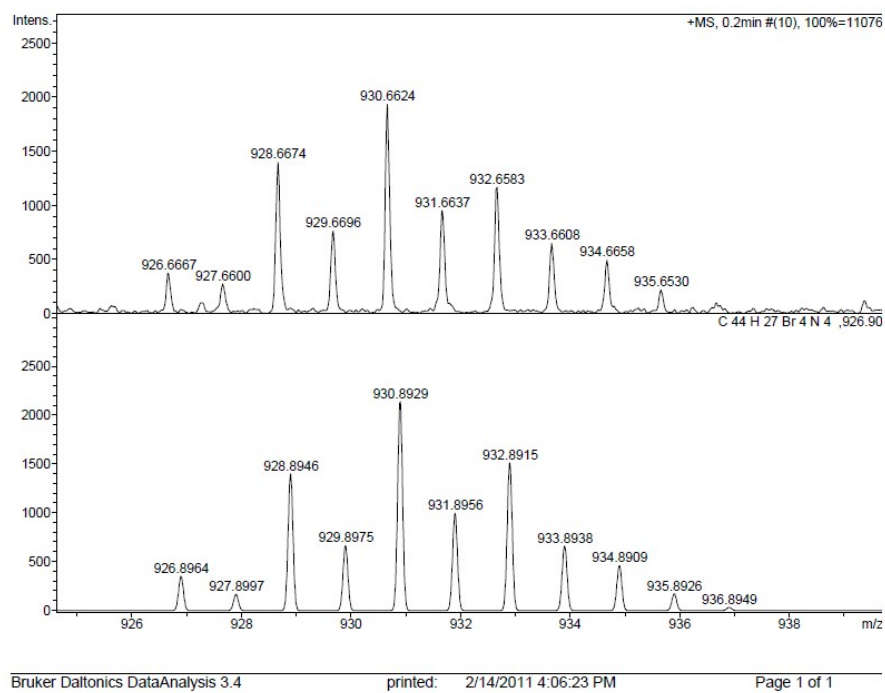

**Figure S8.**ESI-MS spectrum of *meso*-tetrakis(4-bromophenyl)porphyrin ( $H_2$ -TPPBr)

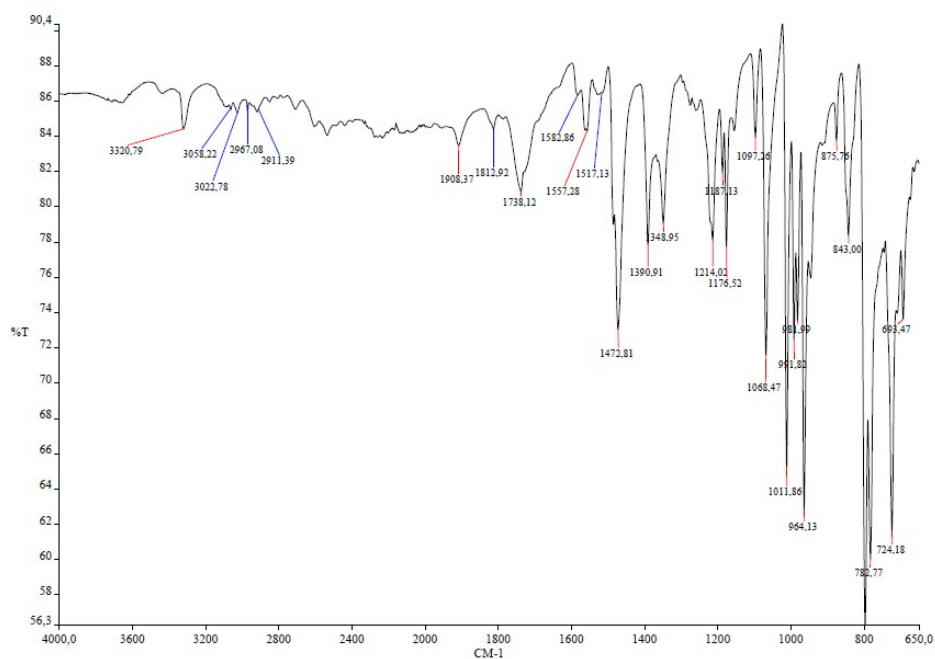

**Figure S9.**FT-IR spectrum of *meso*-tetrakis(4-bromophenyl)porphyrin ( $H_2$ -TPPBr)

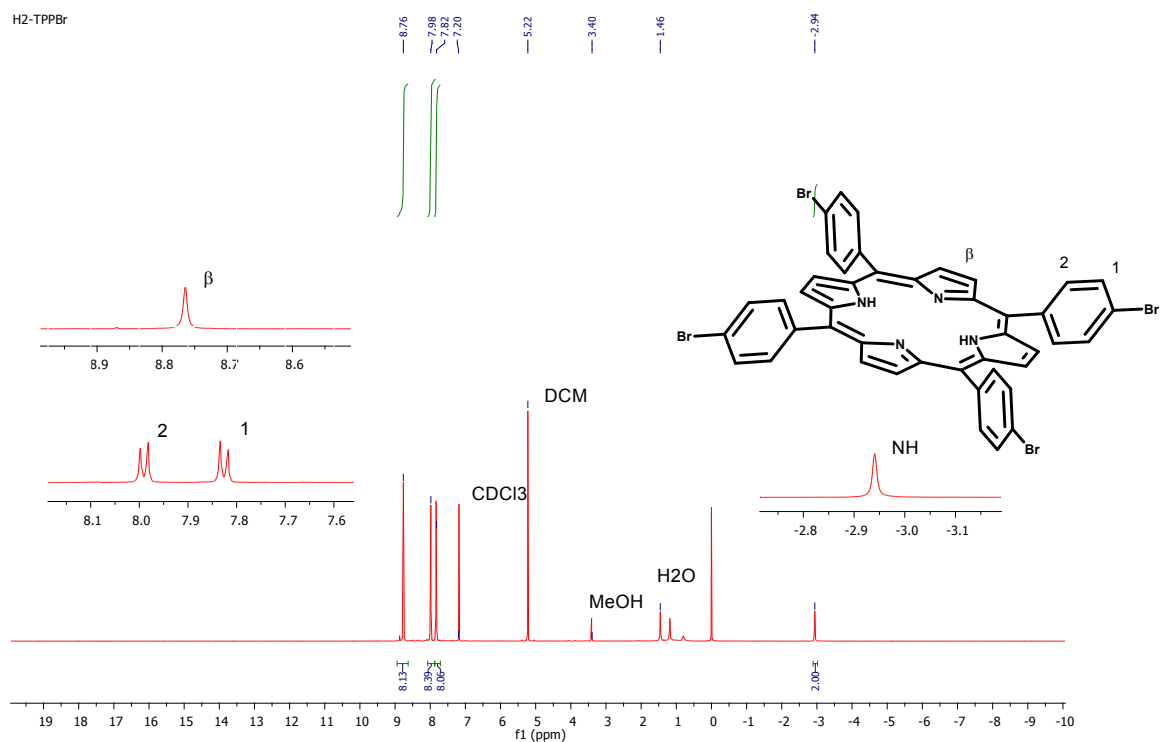

**Figure S10.**  $^1H$  NMR spectrum of *meso*-tetrakis(4-bromophenyl)porphyrin ( $H_2$ -TPPBr) in  $CDCl_3$ .

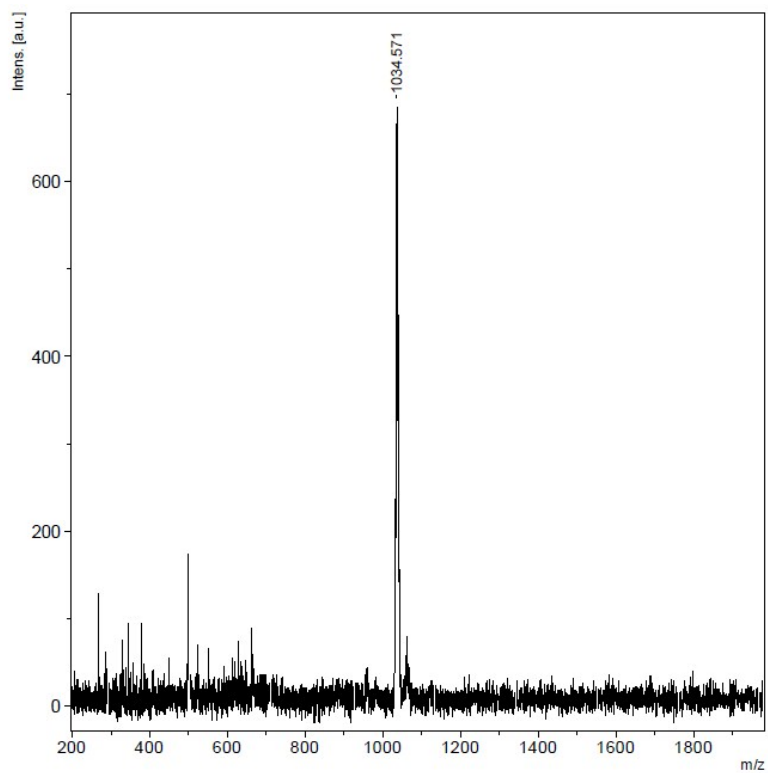

**Figure S11.** MALDI-MS spectrum of *meso*-tetrakis(4-bromophenyl)porphyrinato Palladium(II) ( $Pd$ -TPPBr)



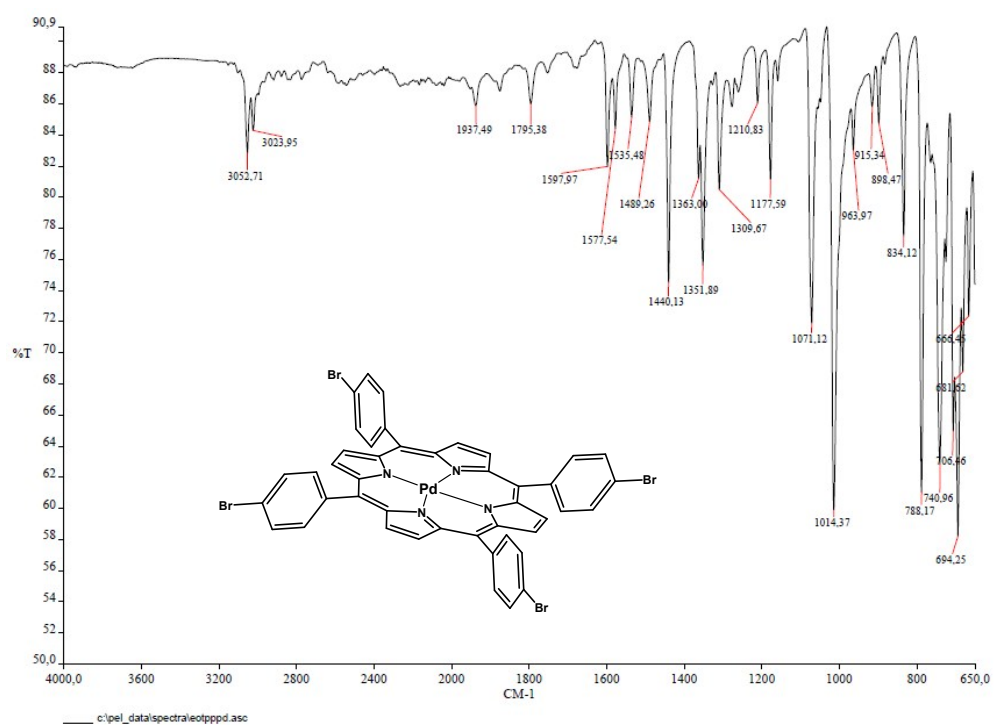

**Figure S12.** FT-IR spectrum of *meso*-tetrakis(4-bromophenyl)porphyrinato Palladium(II) (Pd-TPPBr)

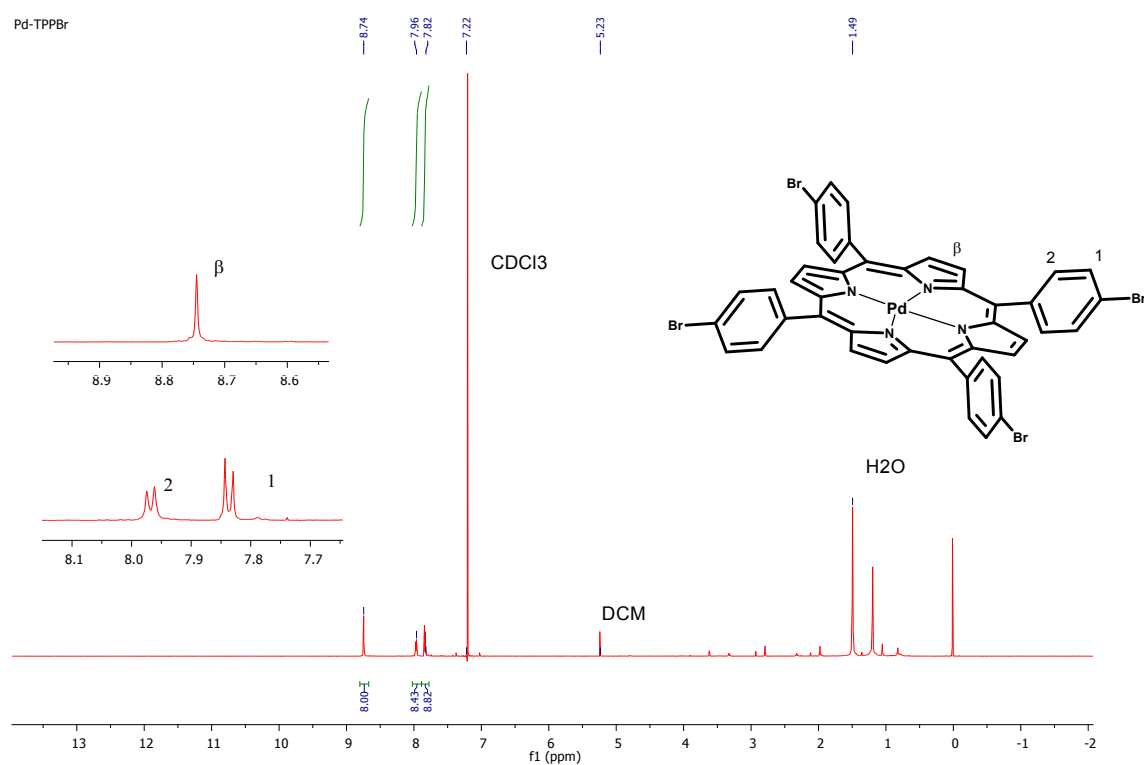

**Figure S13.**  $^1\text{H}$  NMR spectrum of *meso*-tetrakis(4-bromophenyl)porphyrinato Palladium(II) (Pd-TPPBr)

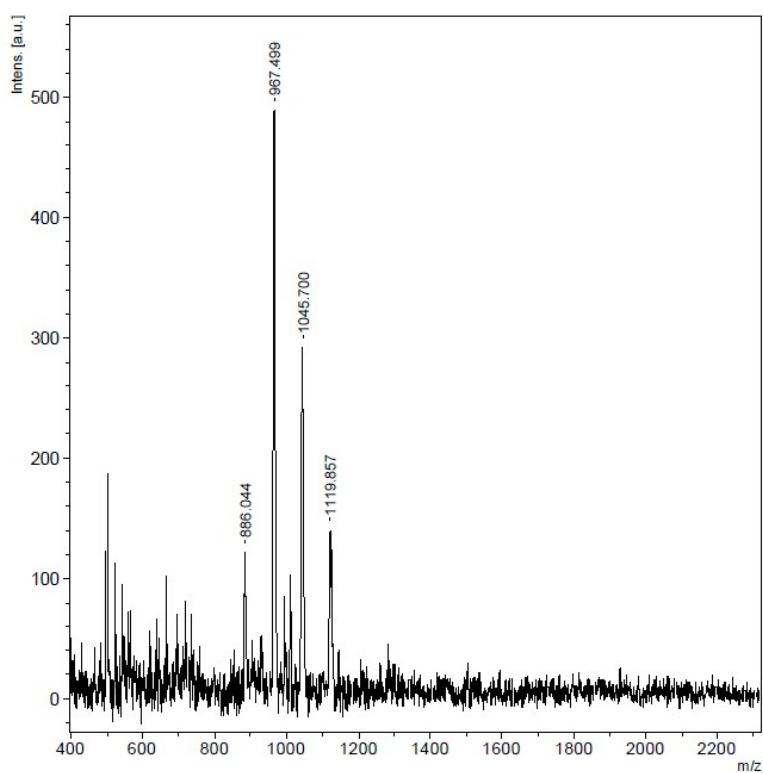

**Figure S14.** MALDI-MS spectrum of *meso*-tetrakis(4-bromophenyl)porphyrinato Platinum(II) (Pt-TPPBr)

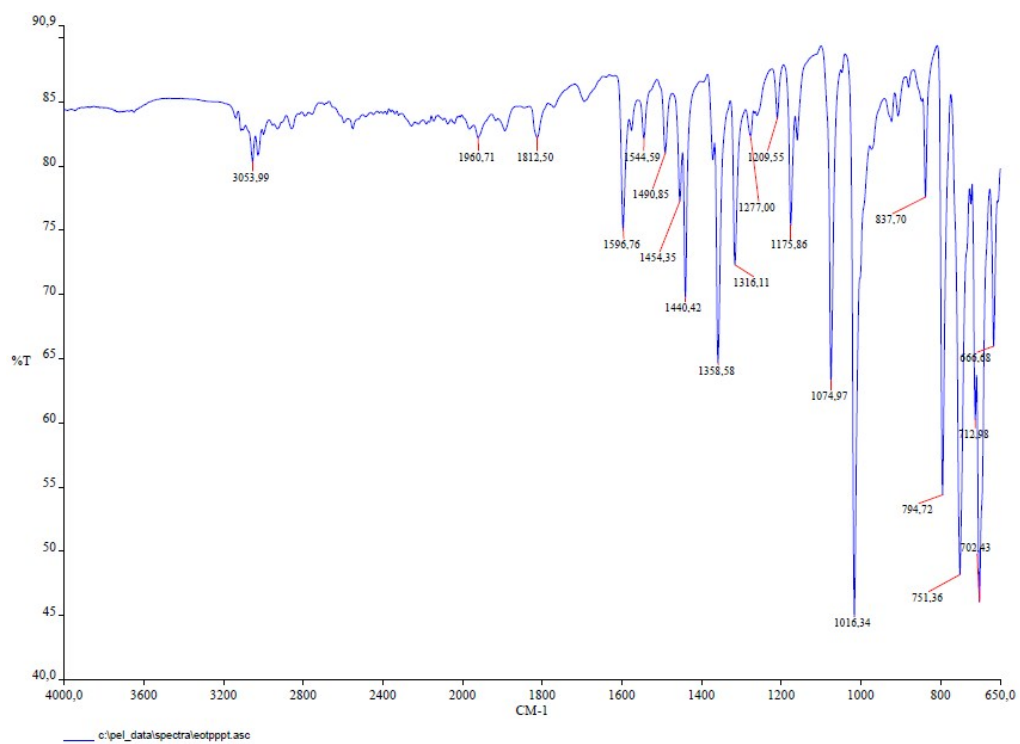

**Figure S15.** FT-IR spectrum of *meso*-tetrakis(4-bromophenyl)porphyrinato Platinum(II) (Pt-TPPBr)

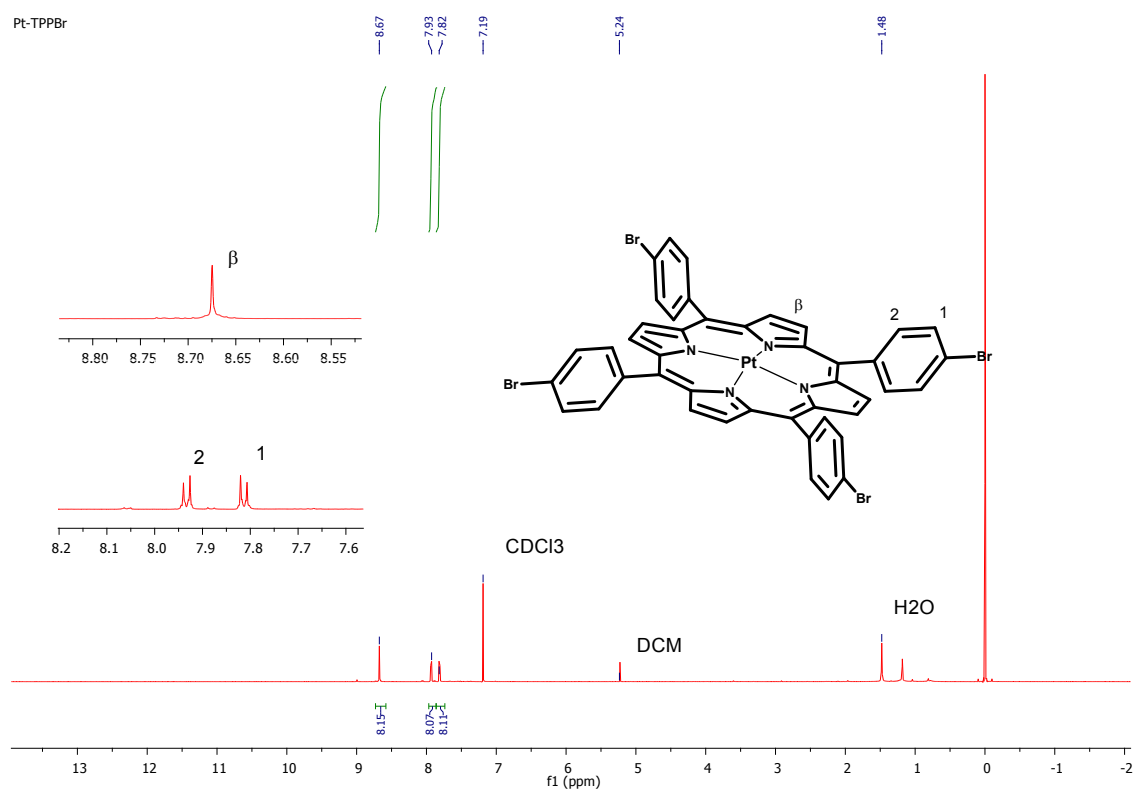

**Figure S16.**  $^1\text{H}$  NMR spectrum of *meso*-tetrakis(4-bromophenyl)porphyrinato Platinum(II) (Pt-TPPBr)

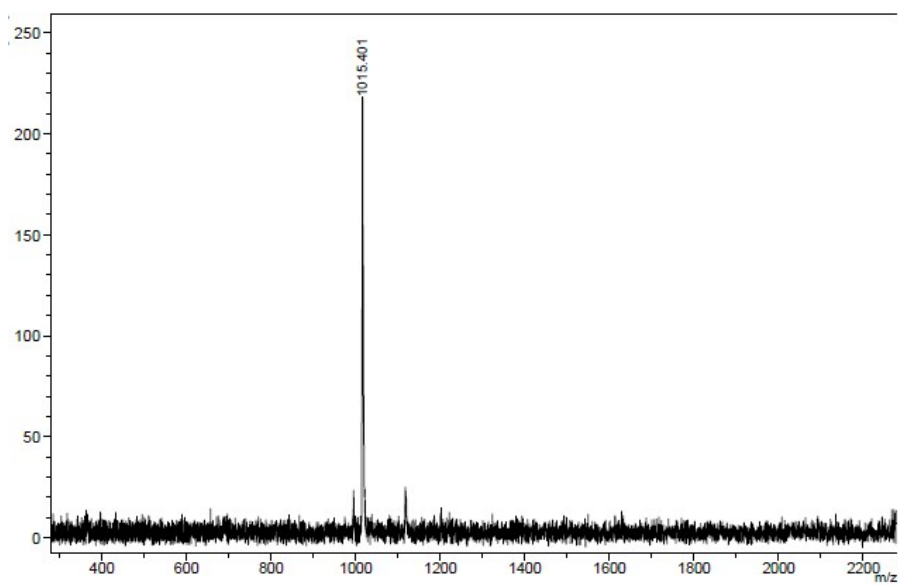

**Figure S17.** MALDI-MS spectrum of *meso*-tetrakis(4-phenylethynyl)phenylporphyrin ( $\text{H}_2$ -TPA)

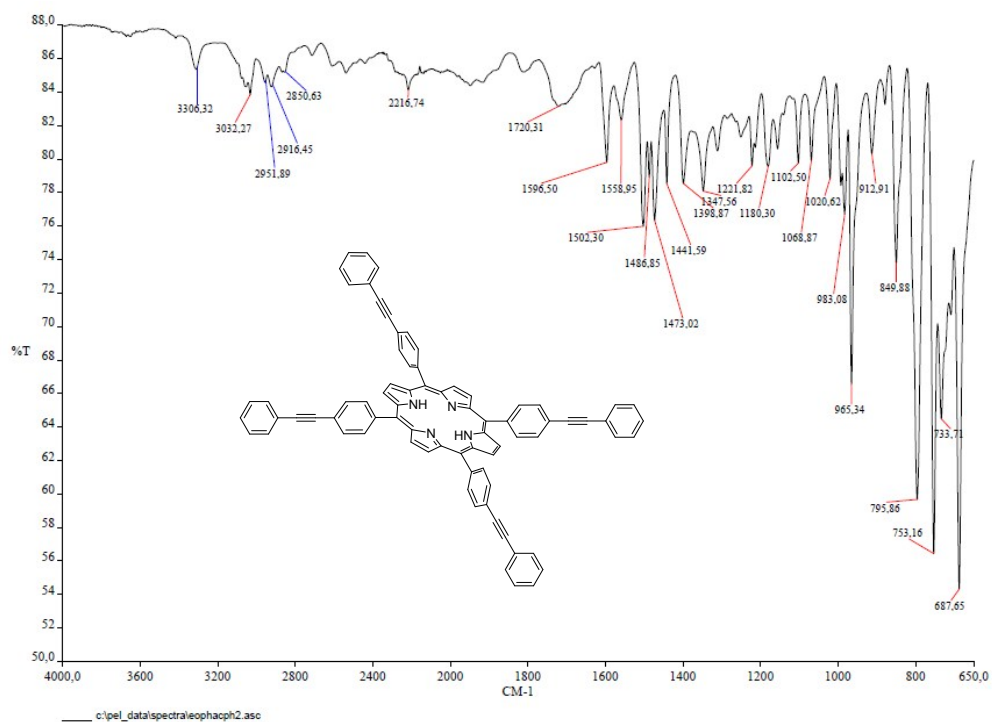

**Figure S18.** FT-IR spectrum of *meso*-tetrakis(4-phenylethynyl)phenylporphyrin ( $H_2$ -TPA)

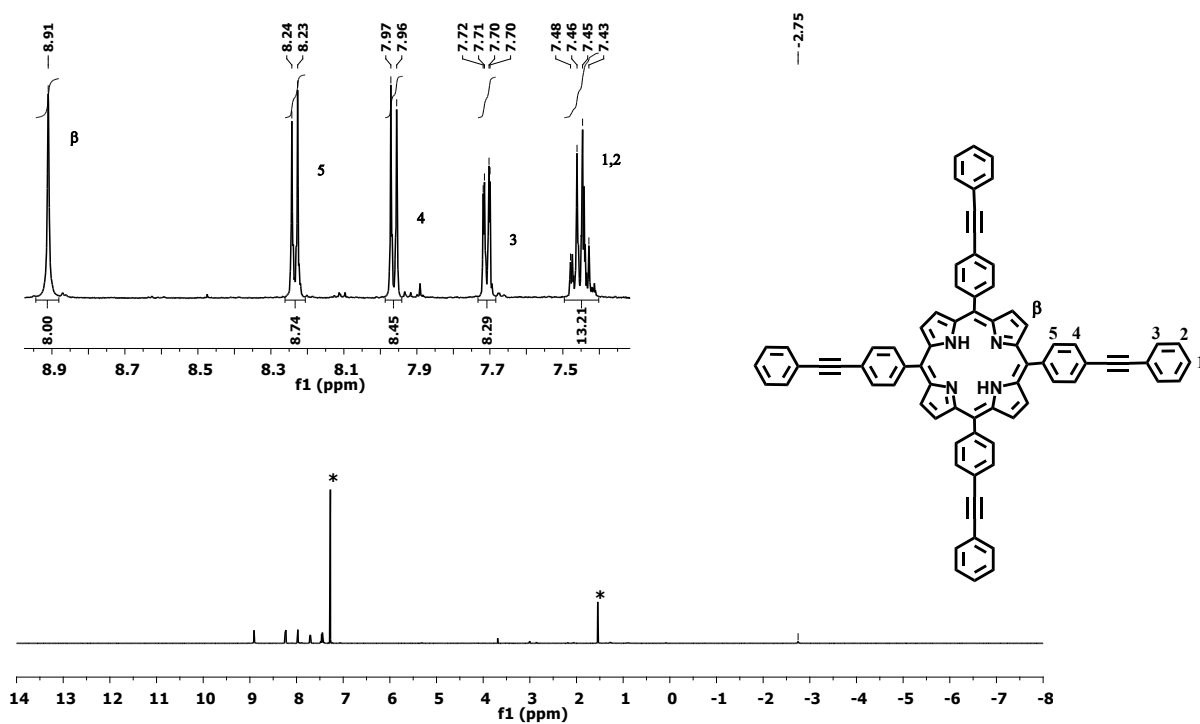

**Figure S19.**  $^1H$  NMR spectrum of *meso*-tetrakis(4-phenylethynyl)phenylporphyrin ( $H_2$ -TPA) in  $CDCl_3$ .

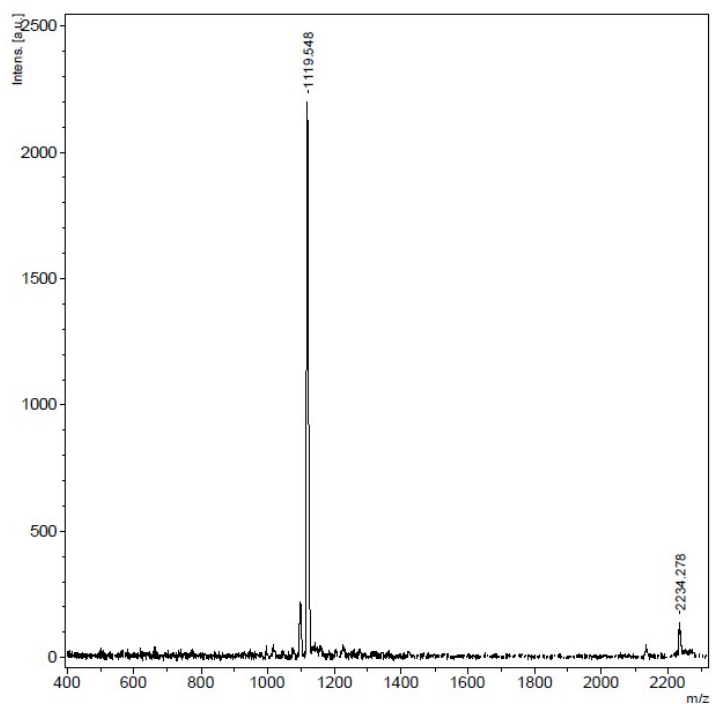

**Figure S20.** MALDI-MS spectrum of *meso*-tetrakis(4-phenylethynyl)phenylporphyrinato Palladium(II) (Pd-TPA).

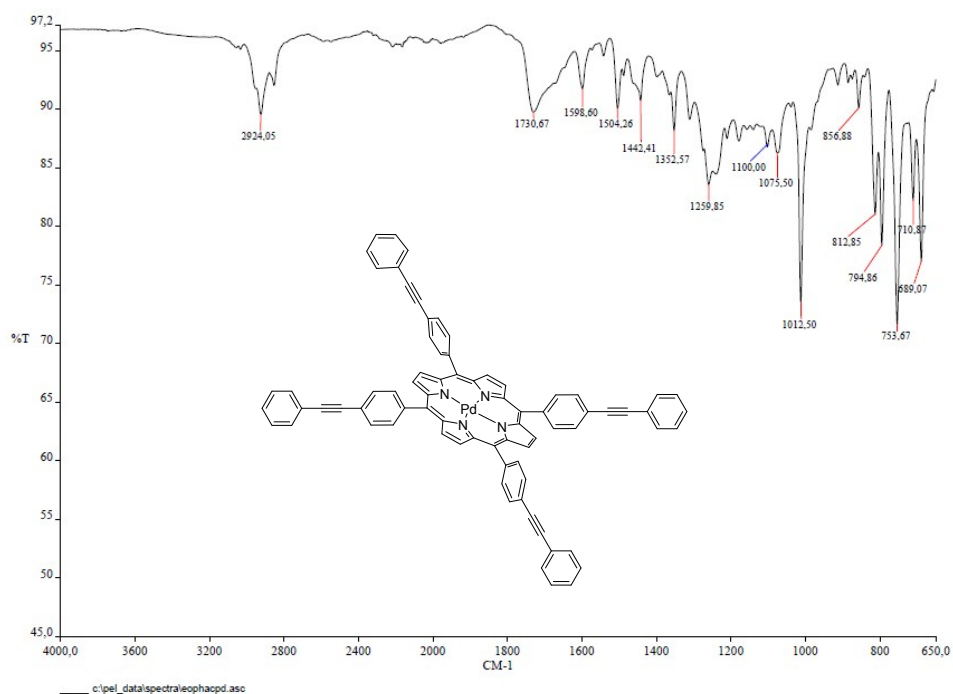

**Figure S21.** FT-IR spectrum of *meso*-tetrakis(4-phenylethynyl)phenylporphyrinato Palladium(II) (Pd-TPA).

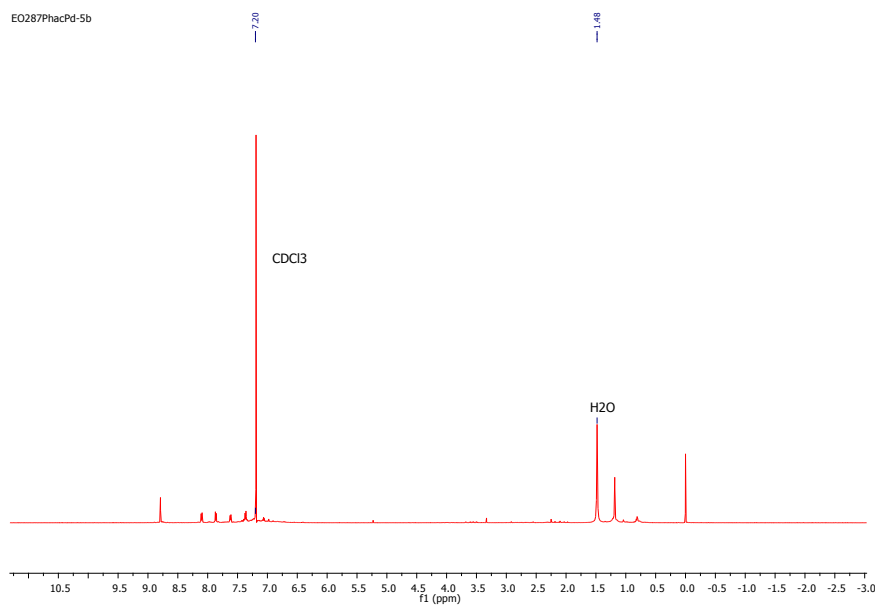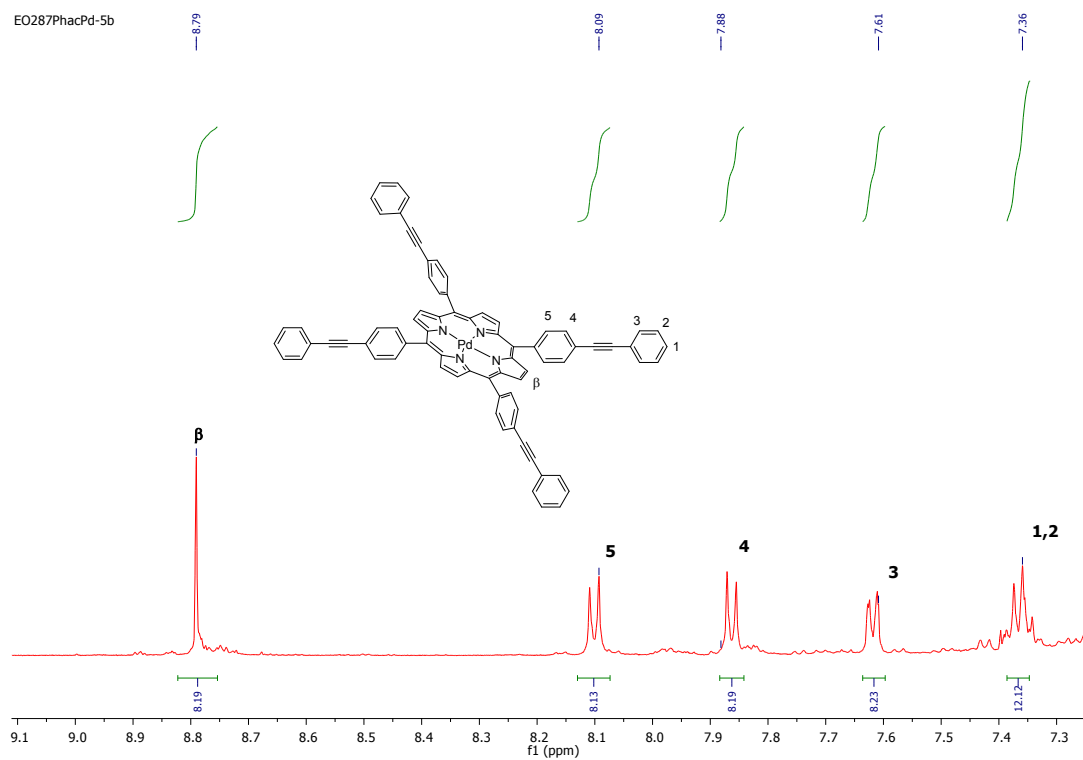

**Figure S22.** <sup>1</sup>H NMR spectrum of *meso*-tetrakis(4-phenylethynyl)phenylporphyrinato Palladium(II) (Pd-TPA) in CDCl<sub>3</sub>.

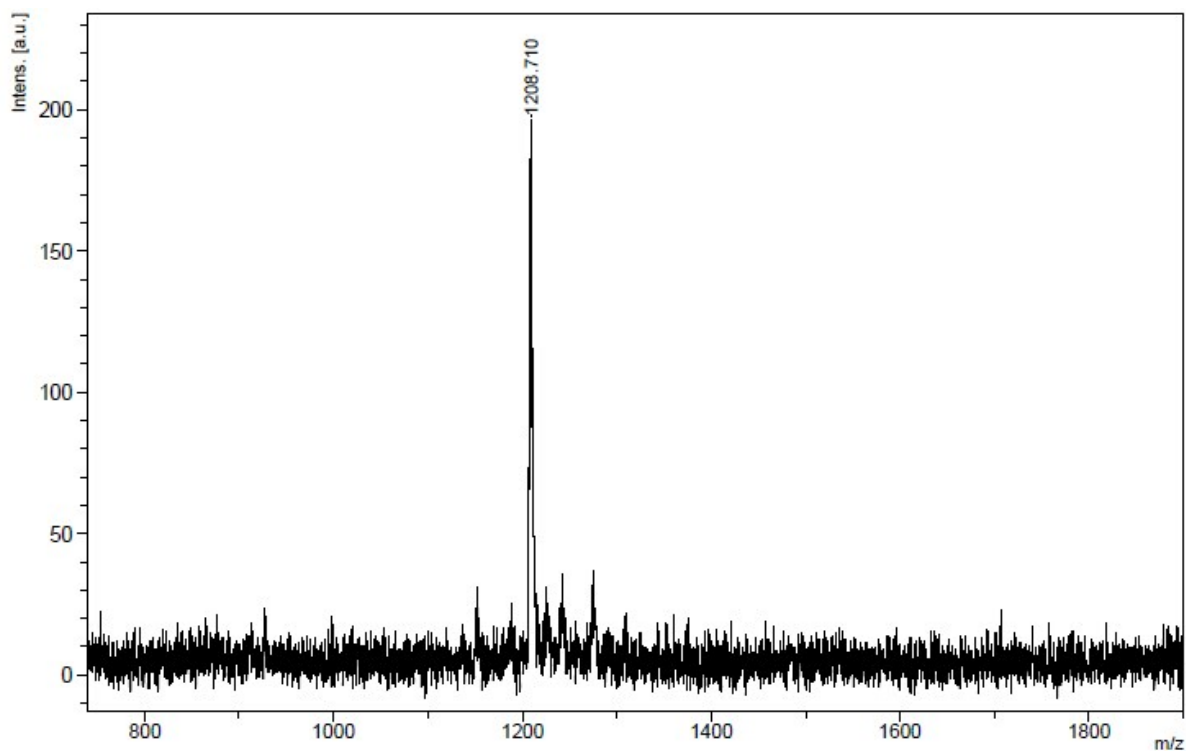

**Figure S23.** MALDI-MS spectrum of *meso*-tetrakis(4-phenylethynyl)phenylporphyrinato Platinum(II) (**Pt-TPA**).

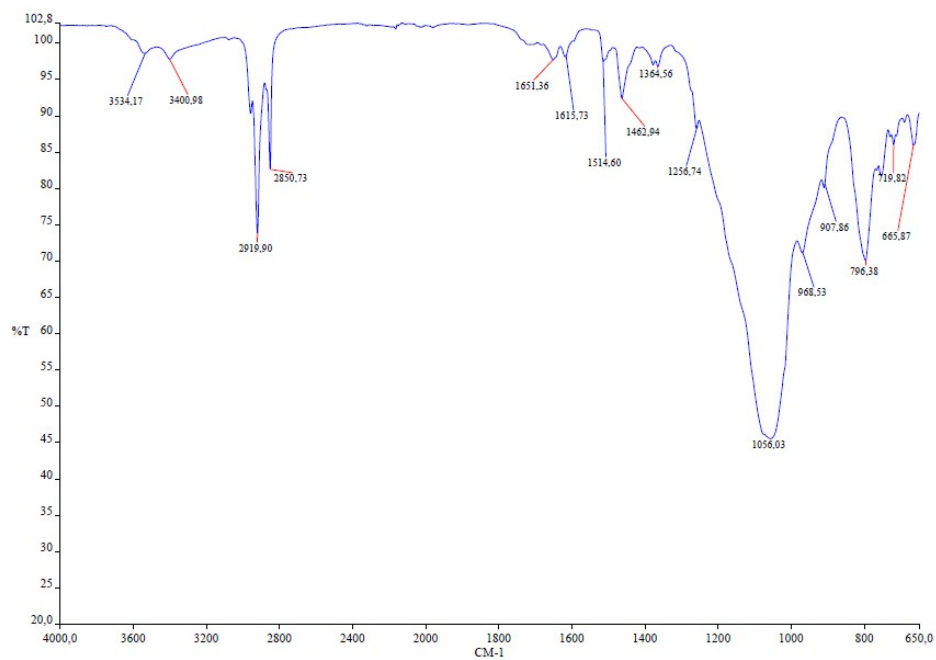

**Figure S24.** FT-IR spectrum of *meso*-tetrakis(4-phenylethynyl)phenylporphyrinato Platinum(II) (**Pt-TPA**).

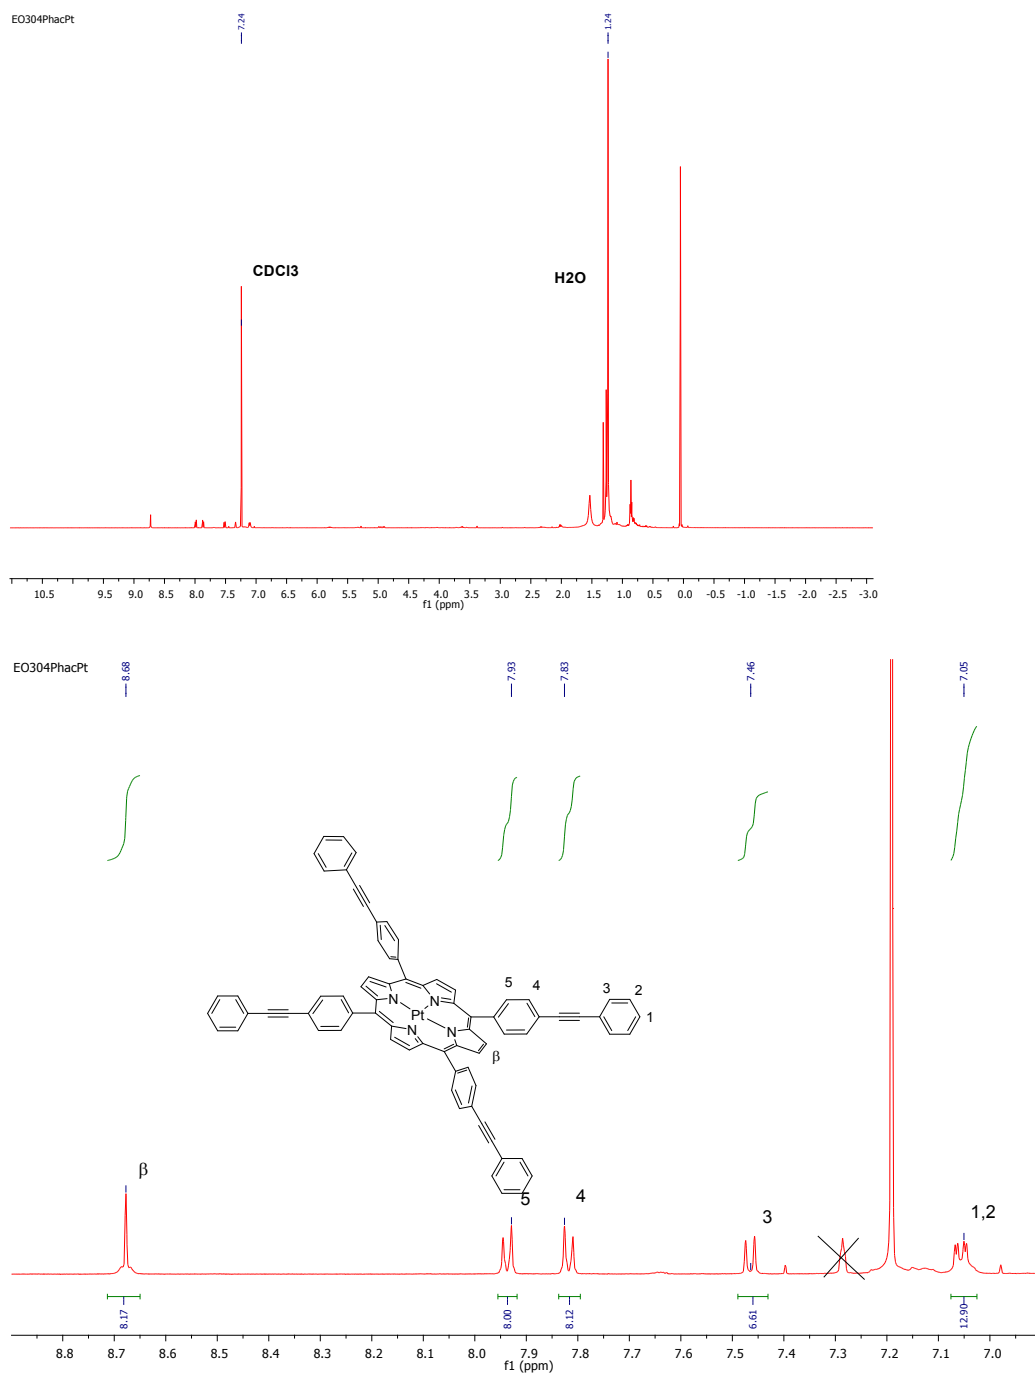

**Figure S25.** <sup>1</sup>H NMR spectrum of *meso*-tetrakis(4-phenylethynyl)phenylporphyrinato Platinum(II) (Pt-TPA) in CDCl<sub>3</sub>.



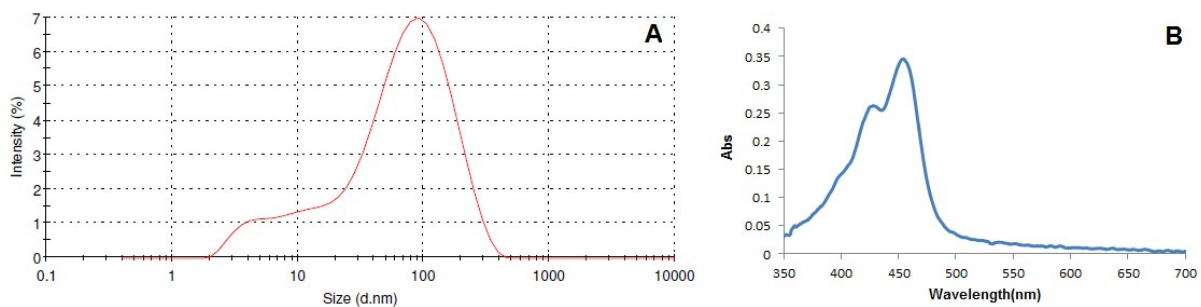

Figure S26: Characterization of silver nanoparticles (AgNPs): A) Size distribution analysis, and B) UV-Vis spectra in THF.

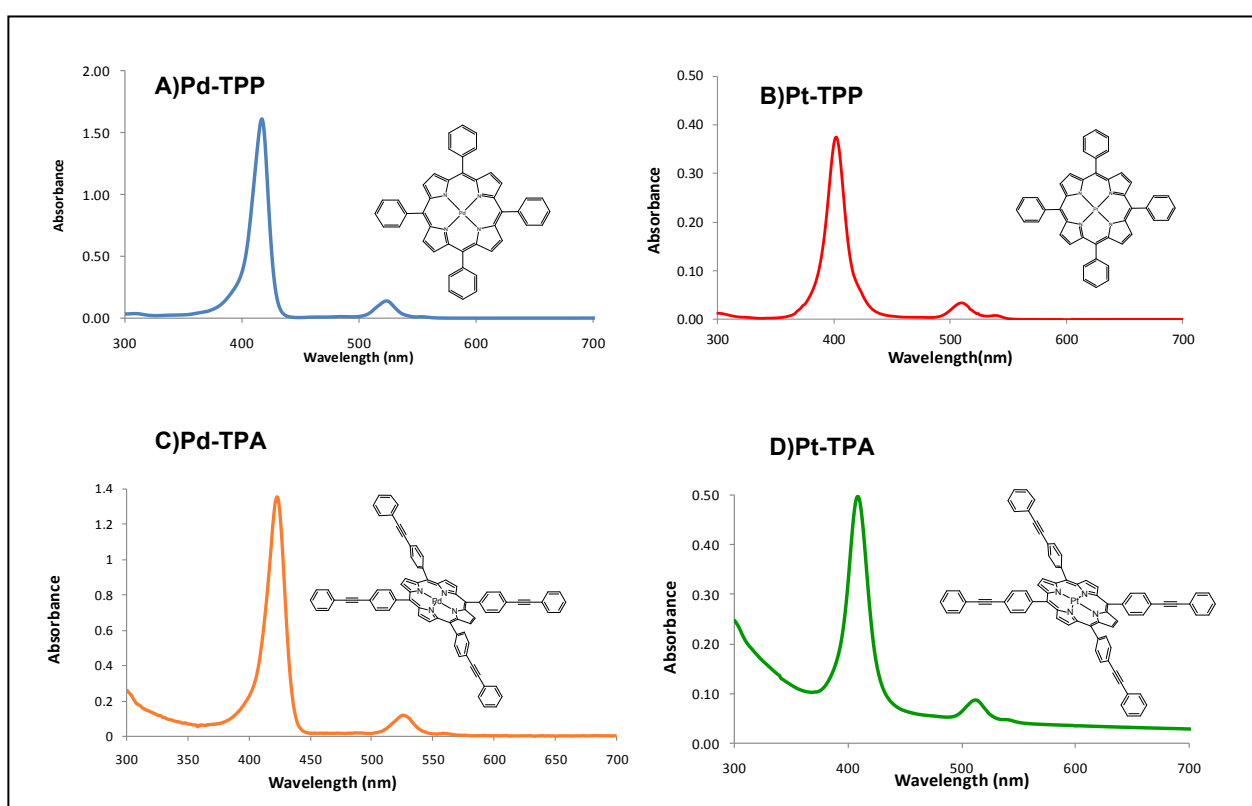

Figure S27. UV-VIS spectra of A) Pd-TPP ( $\sim 5 \times 10^{-5}$  M), B) Pt-TPP ( $\sim 2 \times 10^{-5}$  M), C) Pd-TPA ( $\sim 5 \times 10^{-5}$  M), D) Pt-TPA ( $\sim 2 \times 10^{-5}$  M) in toluene.

**Table S3.** Absorbance spectra related data of the molecules in toluene and poly(TMSP)-based nanofibers.

| Compound      | Medium                  | $\lambda_{abs}^{Bband}$<br>(nm) | log $\epsilon$ | $\lambda_{abs}^{Q1band}$<br>(nm) | log $\epsilon$ | $\lambda_{abs}^{Q2band}$<br>(nm) | log $\epsilon$ |
|---------------|-------------------------|---------------------------------|----------------|----------------------------------|----------------|----------------------------------|----------------|
| <b>Pd-TPP</b> | Toluene                 | 417                             | 5.45           | 524                              | 4.40           | 555                              | *              |
|               | Poly(TMSP) <sup>a</sup> | 423                             | -              | 531                              | -              | *                                | -              |
| <b>Pt-TPP</b> | Toluene                 | 403                             | 5.43           | 509                              | 5.40           | 540                              | 3.80           |
|               | Poly(TMSP) <sup>a</sup> | 408                             | -              | 516                              | -              | 546                              | -              |
| <b>Pd-TPA</b> | Toluene                 | 426                             | 5.02           | 526                              | 4.01           | 559                              | 3.23           |
|               | Poly(TMSP) <sup>a</sup> | 429                             | -              | 534                              | -              | 569                              | -              |
| <b>Pt-TPA</b> | Toluene                 | 409                             | 5.12           | 515                              | 4.35           | 545                              |                |
|               | Poly(TMSP) <sup>a</sup> | 413                             | -              | 520                              | -              | 550                              | -              |

<sup>a</sup> thin film coated on mylar support

\* The absorbance values were not enough to accurate report.

-Not calculated.

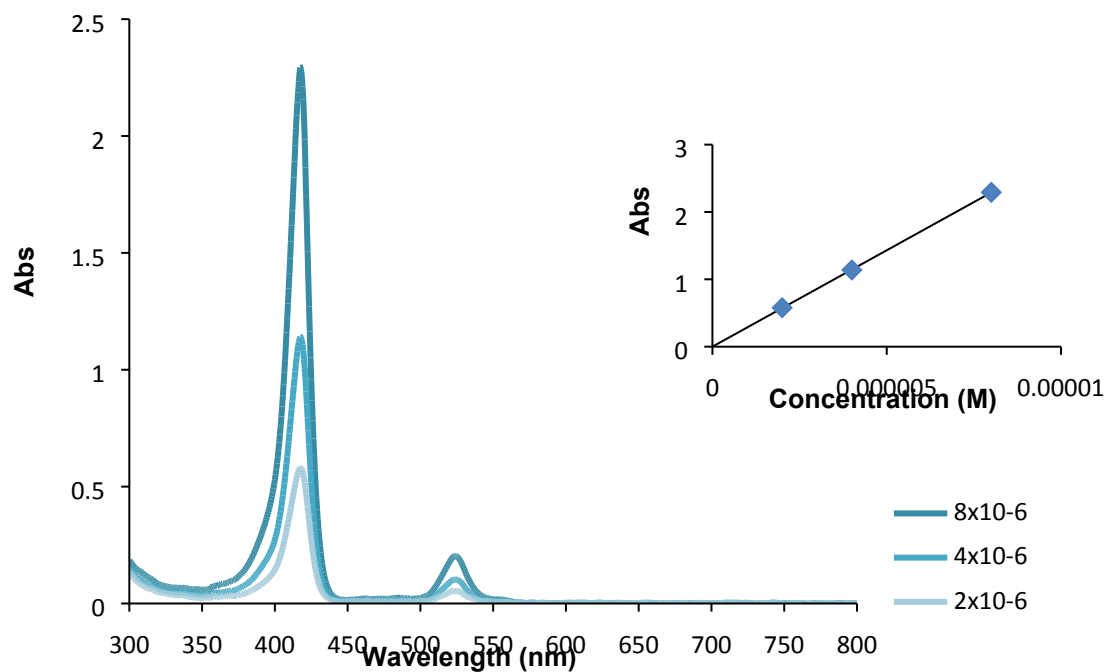

**Figure S28:** UV-Vis spectra of **Pd-TPP** in toluene at three different concentrations, inset: The plot of B band absorption intensities vs concentration.

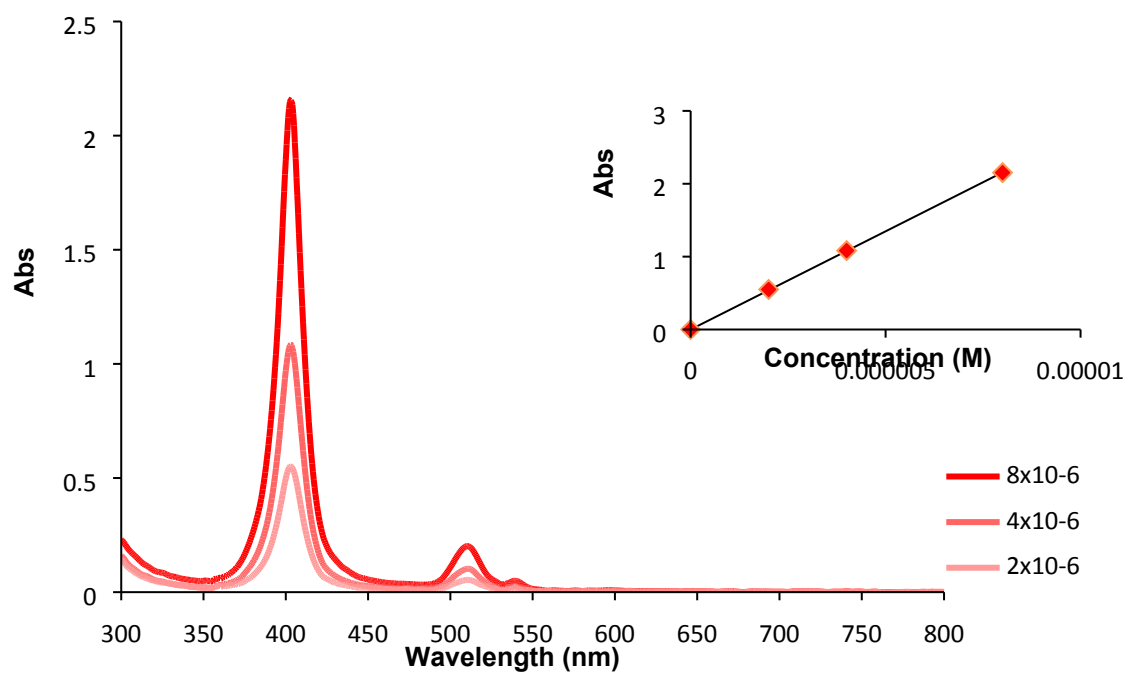

**Figure S29:** UV-Vis spectra of **Pt-TPP** in toluene at three different concentrations, inset: The plot of B band absorption intensities vs concentration.

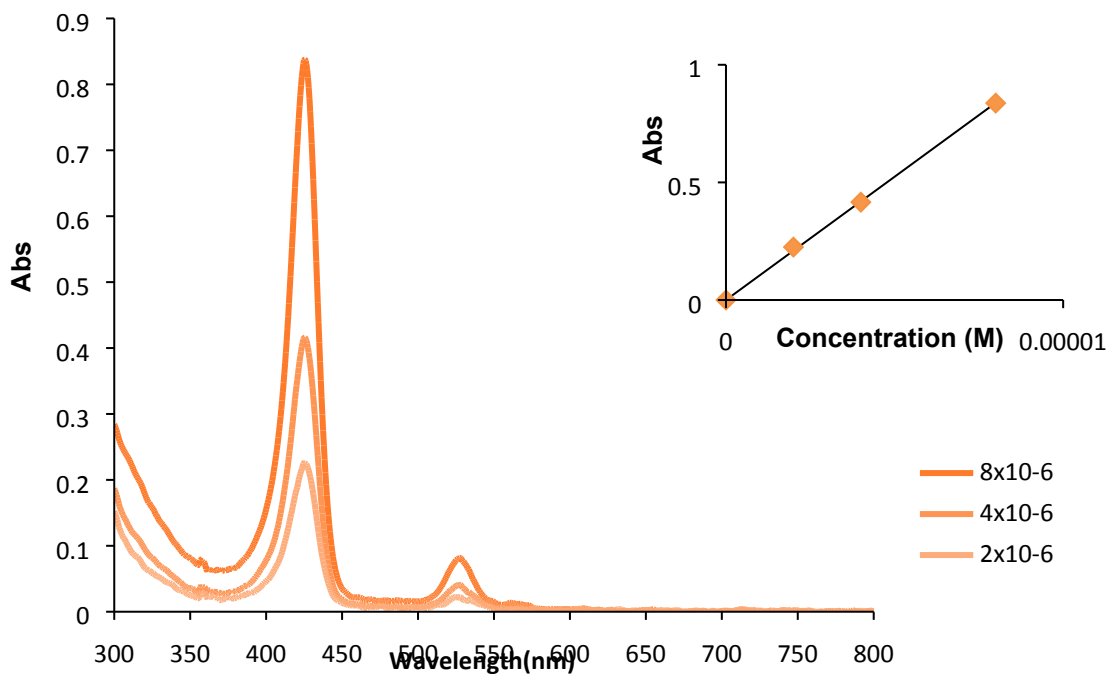

**Figure S30:** UV-Vis spectra of Pd-TPA in toluene at three different concentrations, inset: The plot of B band absorption intensities vs concentration.

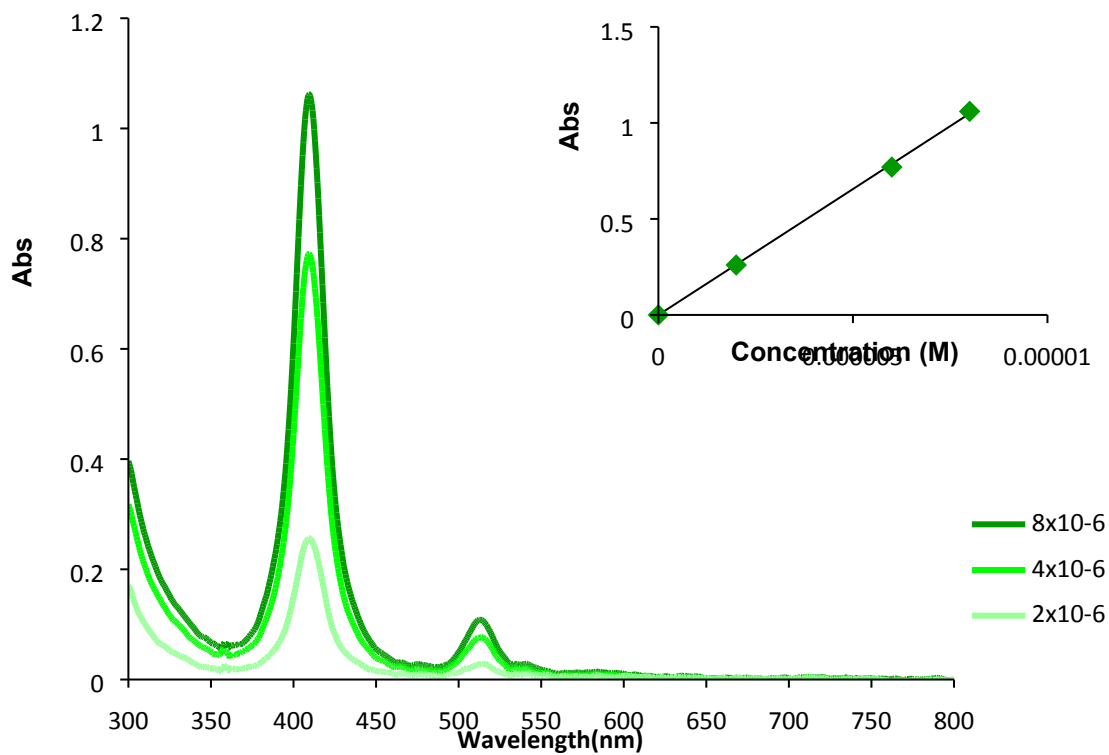

**Figure S31:** UV-Vis spectra of Pt-TPA in toluene at three different concentrations, inset: The plot of B band absorption intensities vs concentration.

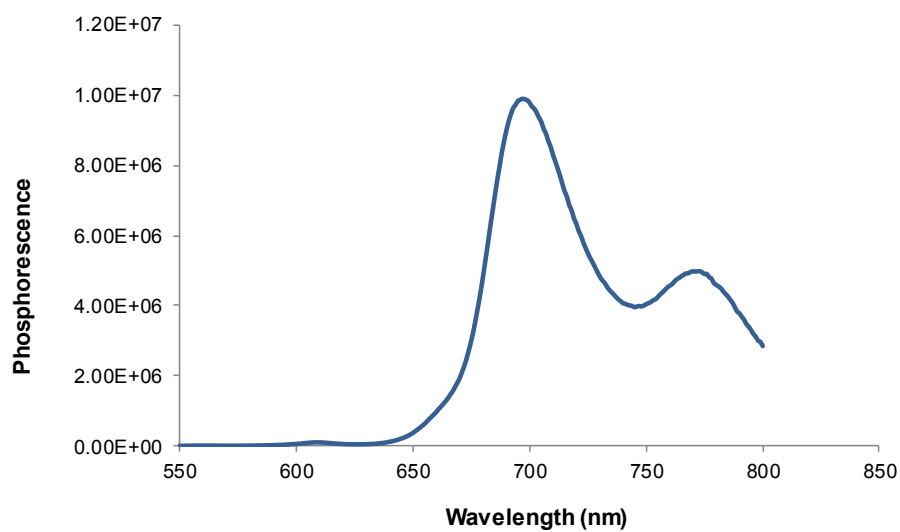

**Figure S32.** Phosphorescence emission spectra of **Pd-TTP** in toluene after exposure to argon gas ( $\sim 8.3 \times 10^{-6}$  M).

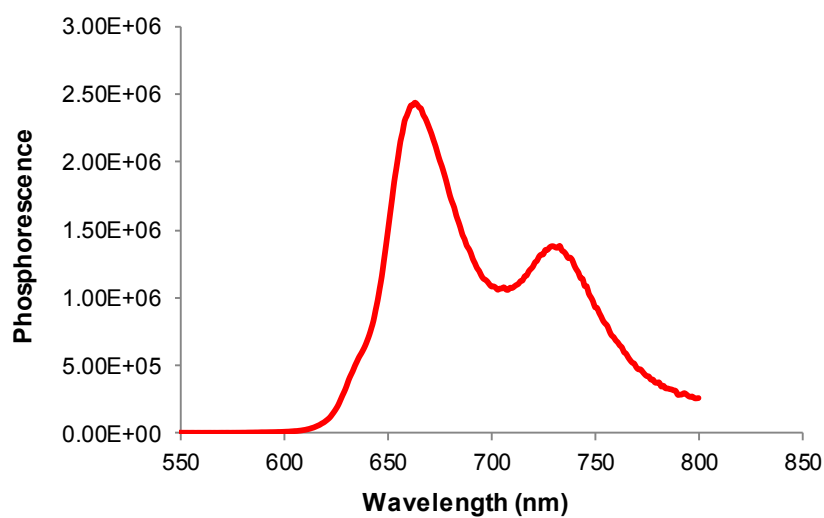

**Figure S33.** Phosphorescence emission spectra spectra of **Pt-TTP** in toluene after exposure to argon gas ( $\sim 5.0 \times 10^{-6}$  M).

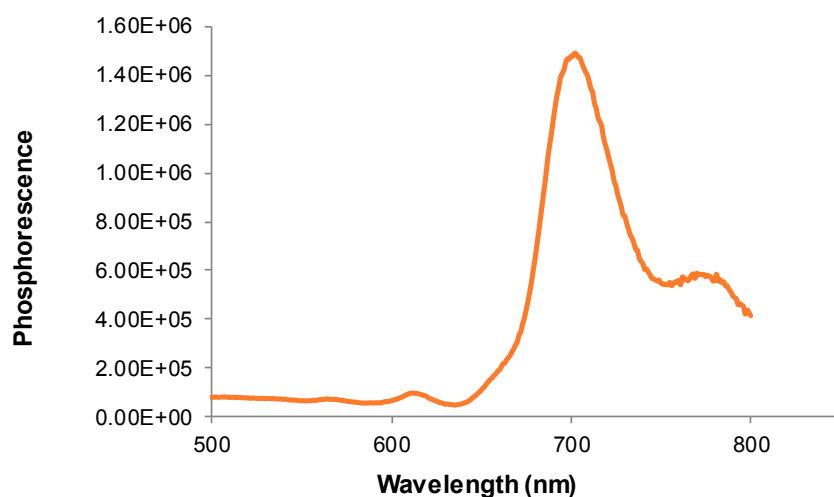

**Figure S34.** Phosphorescence emission spectra of **Pd-TPA** in toluene after exposure to argon gas ( $\sim 5 \times 10^{-6}$  M).

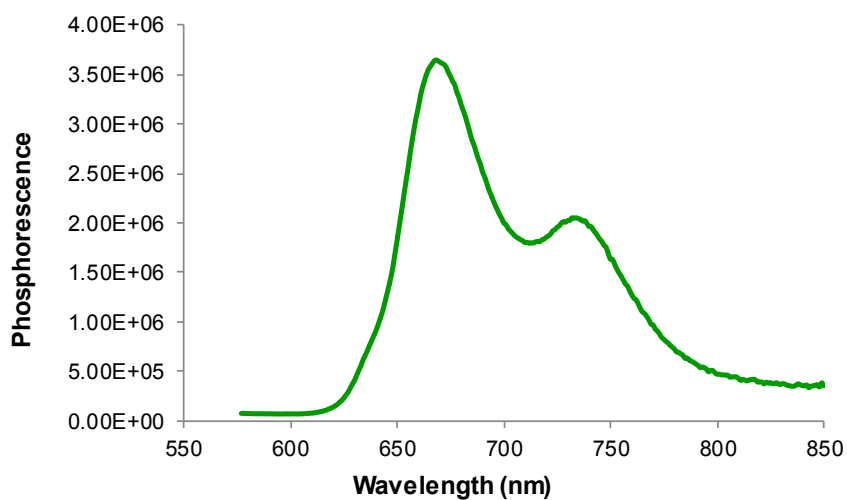

**Figure S35.** Phosphorescence emission spectra of **Pt-TPA** in toluene after exposure to argon gas ( $\sim 3.8 \times 10^{-6}$  M).

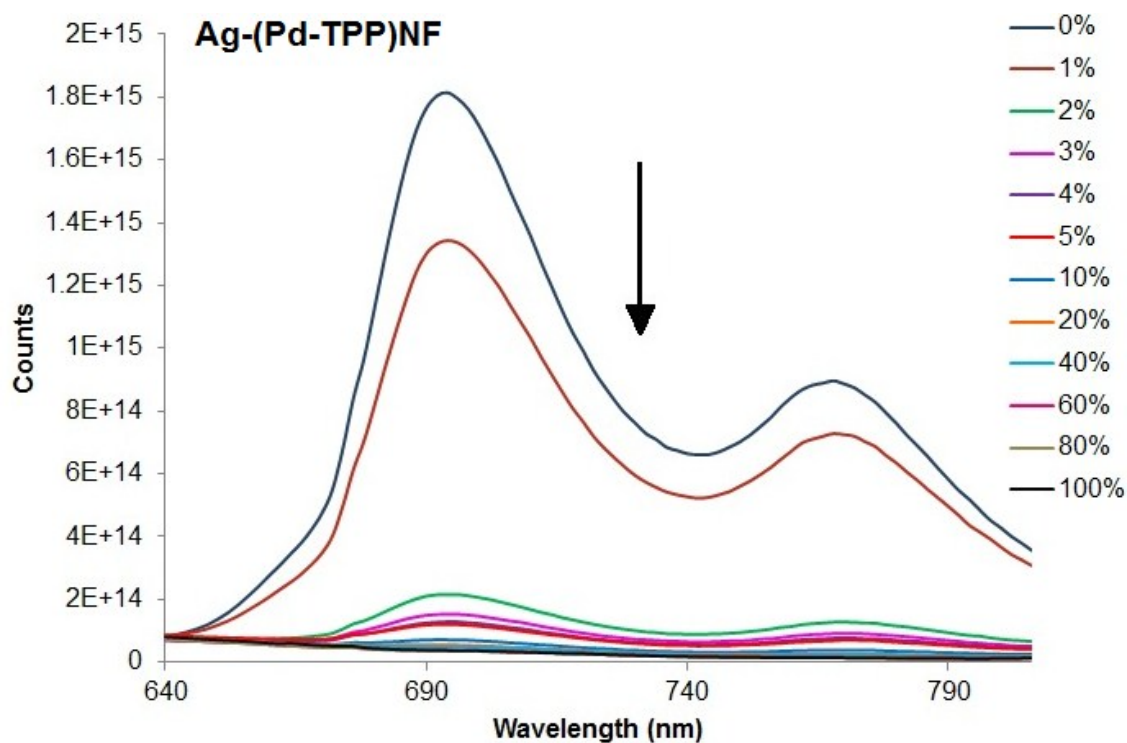

**Figure S36.** Emission spectra of Ag-(Pd-TPP)NF under small steps of O<sub>2</sub> partial pressures.

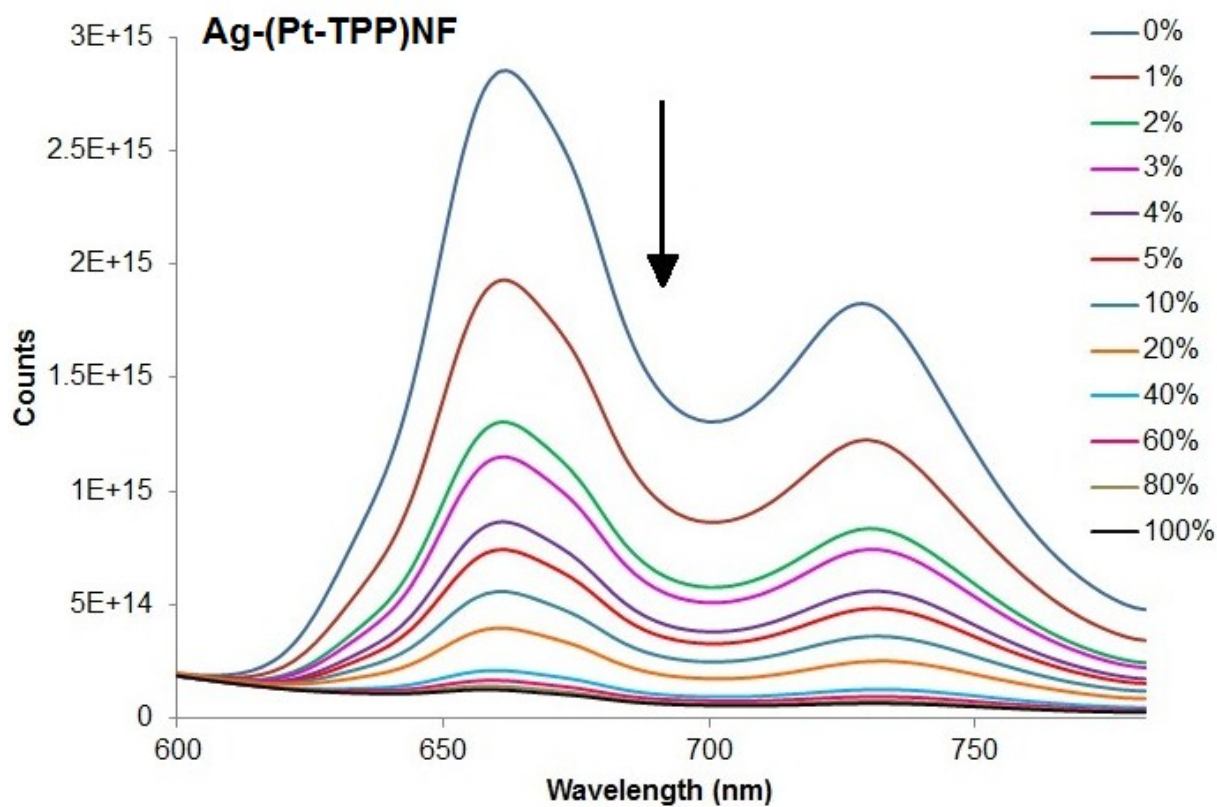

**Figure S37.** Emission spectra of Ag-(Pt-TPP)NF under small steps of O<sub>2</sub> partial pressures.

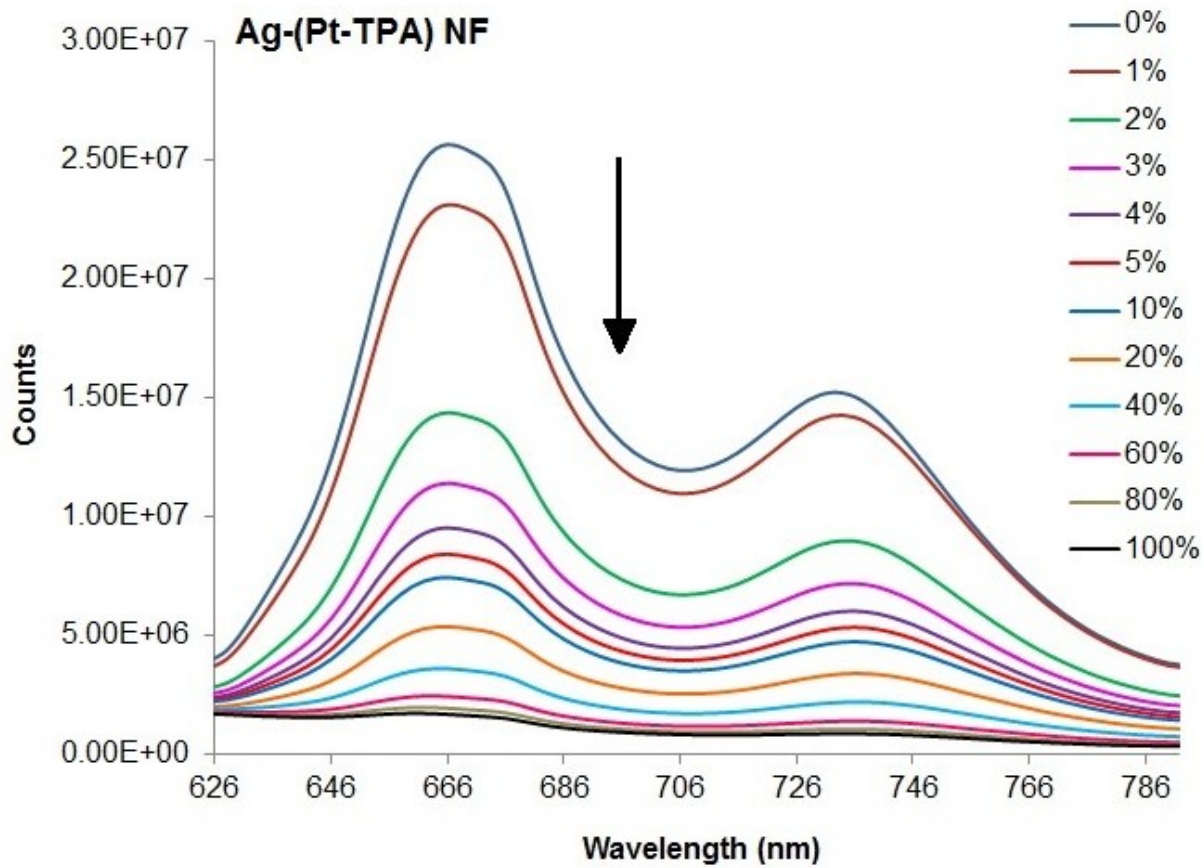

**Figure S38.** Emission spectra of Ag-(Pt-TPA)NF under small steps of O<sub>2</sub> partial pressures.



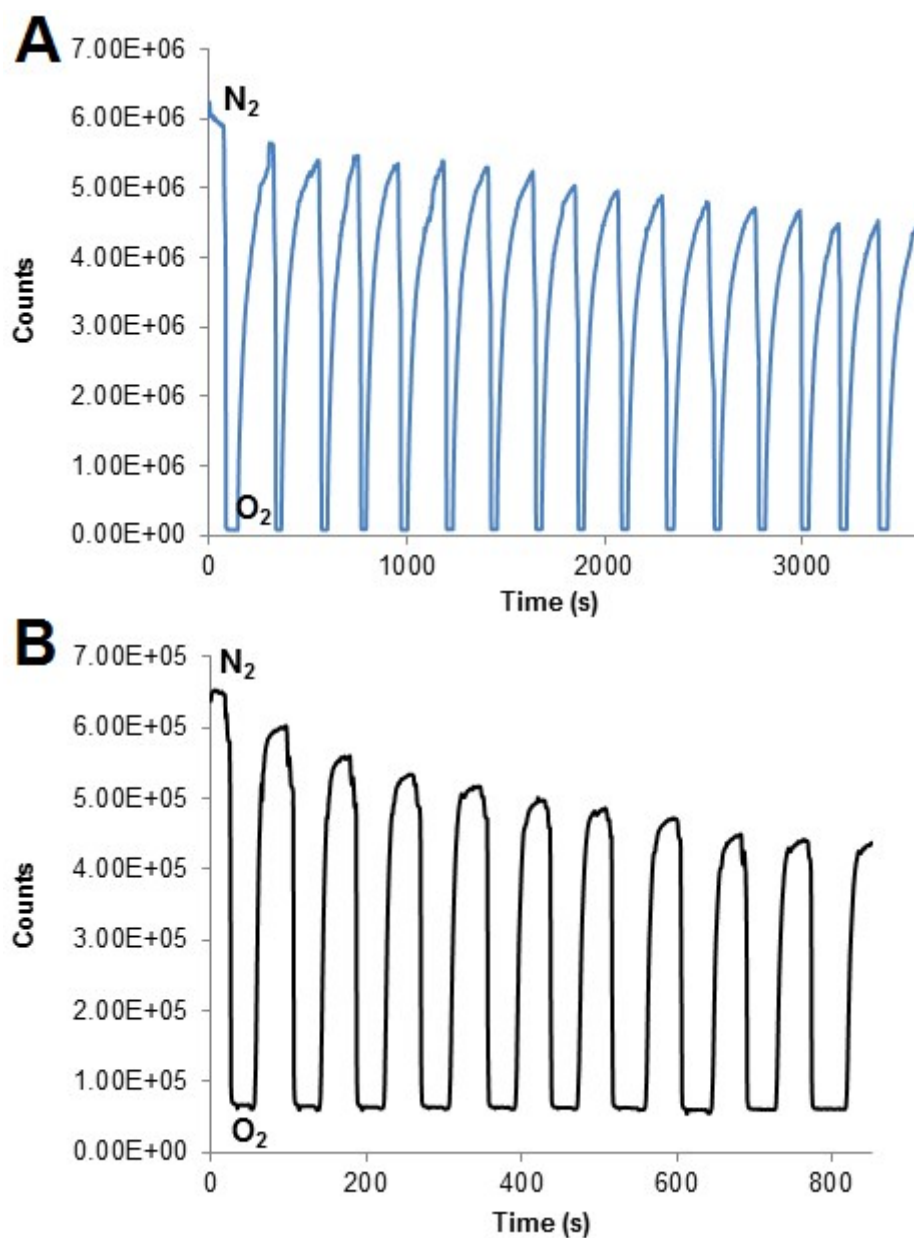

**Figure S39.** Time-based emission of **Pd-TPP** based nanofiber on going from 100 %  $O_2$  to 100 %  $N_2$ : (A) Nano Ag free nanofiber (B) nanofiber with nano Ag additive.

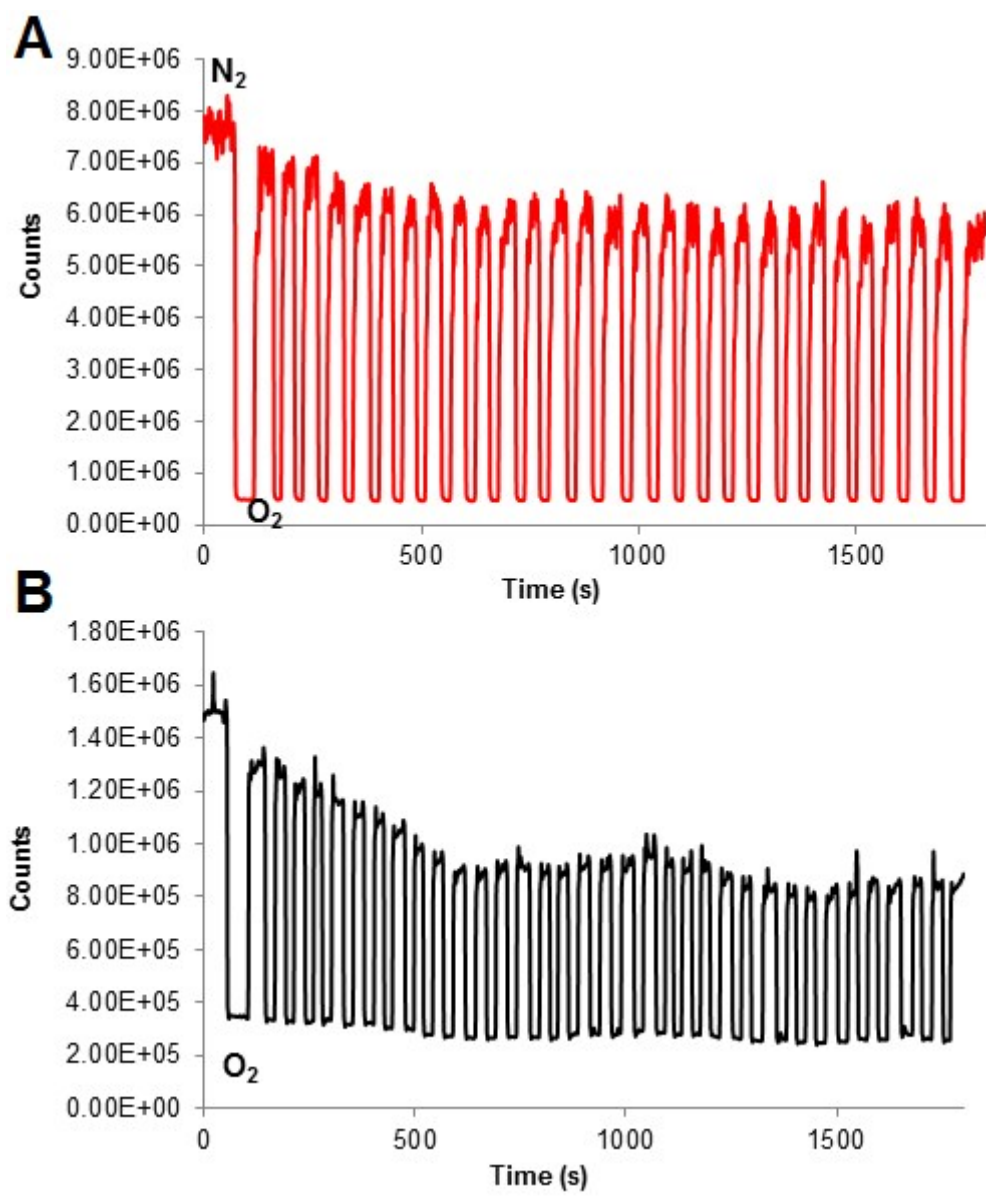

**Figure S40.** Time-based emission of **Pt-TPP** based nanofiber on going from 100 % O<sub>2</sub> to 100 % N<sub>2</sub> : (A) Nano Ag free nanofiber (B) nanofiber with nano Ag additive.

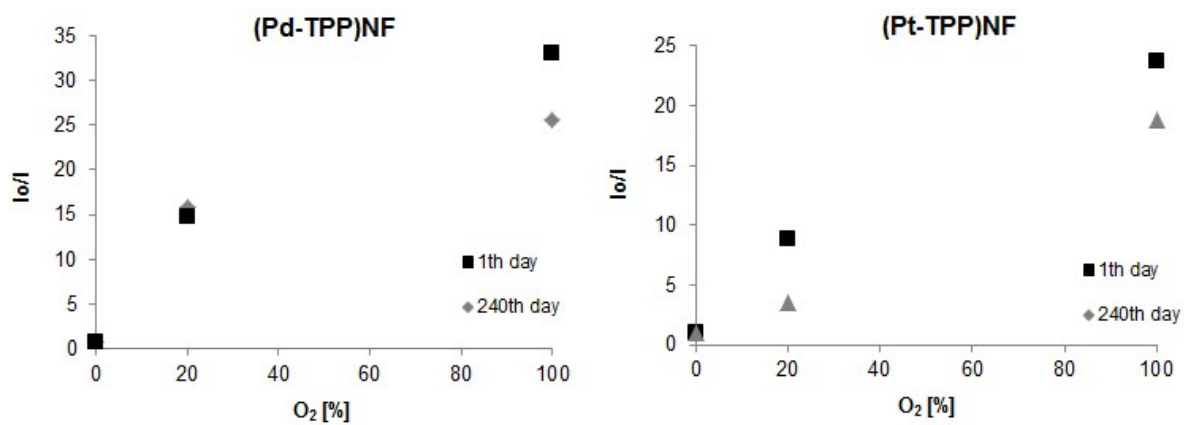

**Figure S41.** Repeatability test results of (Pd-TPP)NF and (Pt-TPA)NF.

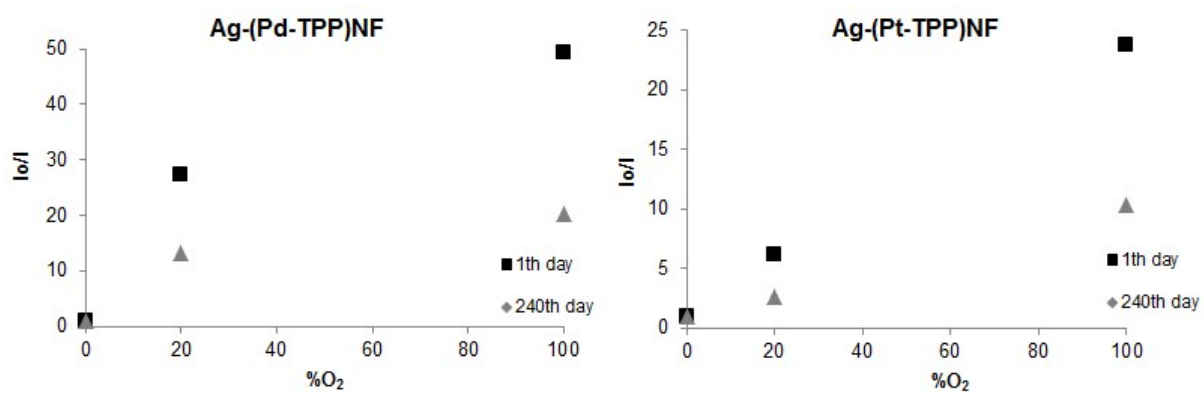

**Figure S42.** Repeatability test results of A) Ag-(Pd-TPP)NF and B) Ag-(Pt-TPP)NF.
